# Supplementary material for: The Malaprade reaction mechanism for ethylene glycol oxidation by periodic acid based on density functional theory (DFT)
Source: Royal Society of Chemistry journal article supplement (doi:10.1039/d2cp04764k), 2023-01-01
Supplement: d2cp04764k1.pdf [file d2cp04764k1.pdf]

## Malaprade reaction mechanism for Ethylene Glycol oxidation by Periodic Acid based on Density Functional Theory (DFT)

Agata Kołodziejczyk<sup>1</sup>, Mikołaj Błaziak<sup>2</sup>, Kinga Podgórnica<sup>4,5</sup>, Aneta Jezierska<sup>3</sup>, Kacper Błaziak<sup>\*4,5</sup>

<sup>1</sup> Institute of Physical Chemistry, Polish Academy of Sciences, Warsaw 01-224, Poland

<sup>2</sup> Department of Cardiology, Wrocław Medical University, ul. Pasteura 4, 50-367 Wrocław, Poland

<sup>3</sup> University of Wrocław, Faculty of Chemistry, ul. F. Joliot-Curie 14, 50-383 Wrocław, Poland

<sup>4</sup> Faculty of Chemistry, University of Warsaw, ul. Pasteura 1, 01-224 Warsaw, Poland

<sup>5</sup> Biological and Chemical Research Center, University of Warsaw, ul. Żwirki i Wigury 101, 01-224 Warsaw, Poland

### Table of Contents

|                                                                                                                                                                                   |   |
|-----------------------------------------------------------------------------------------------------------------------------------------------------------------------------------|---|
| <b>1. Computation methodology description and rationalization</b> .....                                                                                                           | 3 |
| <b>Table S1.</b> Comparison of computed Relative Gibbs free energy ( $\Delta G$ [kJ/mol]) computed for transition state structures, using different DFT methods. ....             | 5 |
| <b>Table S2.</b> Comparison of computed Relative Gibbs free energy ( $\Delta G$ [kJ/mol]) computed for intermediate structures, using different DFT methods. ....                 | 5 |
| <b>2. Kinetic and thermodynamic properties</b> .....                                                                                                                              | 6 |
| <b>Table S3.</b> Relative Gibbs free energy ( $\Delta G$ [kJ/mol]) computed at the B3PW91/6-311+G(2d,p), def2-TZVP for iodine atom, (SMD=Water) (SMD=Water) level of theory. .... | 6 |
| <b>Table S4.</b> Relative Gibbs free energy ( $\Delta G$ [kJ/mol]) computed at the CAM-B3LYP/6-311+G(2d,p), def2-TZVP for iodine atom, (SMD=Water) level of theory. ....          | 6 |
| <b>Table S5.</b> Relative Gibbs free energy ( $\Delta G$ [kJ/mol]) computed at the $\omega$ B97XD/6-311+G(2d,p), def2-TZVP for iodine atom, (SMD= Water) level of theory. ....    | 6 |
| <b>Table S6.</b> Relative Gibbs free energy ( $\Delta G$ [kJ/mol]) computed at the BMK/6-311+G(2d,p), def2-TZVP for iodine atom, (SMD= Water) level of theory. ....               | 7 |
| <b>Table S7.</b> Enthalpy ( $\Delta H$ [kJ/mol]) computed at the B3PW91/6-311+G(2d,p), def2-TZVP for iodine atom, (SMD= Water) level of theory.....                               | 7 |
| <b>Table S8.</b> Enthalpy ( $\Delta H$ [kJ/mol]) computed at the CAM-B3LYP/6-311+G(2d,p), (SMD= Water) level of theory.....                                                       | 7 |
| <b>Table S9.</b> Enthalpy ( $\Delta H$ [kJ/mol]) computed at the $\omega$ B97XD/6-311+G(2d,p), def2-TZVP for iodine atom, (SMD= Water) level of theory.....                       | 8 |
| <b>Table S10.</b> Enthalpy ( $\Delta H$ [kJ/mol]) computed at the BMK/6-311+G(2d,p), def2-TZVP for iodine atom, (SMD= Water) level of theory.....                                 | 8 |
| <b>Table S11.</b> Total energy ( $\Delta E$ [kJ/mol]) computed at the B3PW91/6-311+G(2d,p), def2-TZVP for iodine atom, (SMD= Water) level of theory.....                          | 9 |
| <b>Table S12.</b> Total energy ( $\Delta E$ [kJ/mol]) computed at the CAM-B3LYP/6-311+G(2d,p), def2-TZVP for iodine atom, (SMD= Water) level of theory.....                       | 9 |
| <b>Table S13.</b> Total energy ( $\Delta E$ [kJ/mol]) computed at the $\omega$ B97XD/6-311+G(2d,p), def2-TZVP for iodine atom, (SMD= Water) level of theory.....                  | 9 |

|                                                                                                                                                                                             |           |
|---------------------------------------------------------------------------------------------------------------------------------------------------------------------------------------------|-----------|
| <b>Table S14.</b> Total energy ( $\Delta E$ [kJ/mol]) computed at the BMK/6-311+G(2d,p), def2-TZVP for iodine atom, (SMD= Water) level of theory.....                                       | 10        |
| <b>Table S15.</b> Relative Gibbs free energy ( $\Delta G$ [kJ/mol]) computed at the B3PW91/6-311+G(2d,p), DGDZVP for iodine atom, (SMD=Water), (SMD=Water) (SMD=Water) level of theory..... | 10        |
| <b>Table S16.</b> Relative Gibbs free energy ( $\Delta G$ [kJ/mol]) computed at the CAM-B3LYP/6-311+G(2d,p), def2-TZVP for iodine atom, (SMD=Water) level of theory.....                    | 10        |
| <b>Table S17.</b> Relative Gibbs free energy ( $\Delta G$ [kJ/mol]) computed at the $\omega$ B97XD/6-311+G(2d,p), DGDZVP for iodine atom, (SMD= Water) level of theory.....                 | 11        |
| <b>Table S18.</b> Relative Gibbs free energy ( $\Delta G$ [kJ/mol]) computed at the BMK/6-311+G(2d,p), DGDZVP for iodine atom, (SMD= Water) level of theory.....                            | 11        |
| <b>Table S19.</b> Enthalpy ( $\Delta H$ [kJ/mol]) computed at the B3PW91/6-311+G(2d,p), DGDZVP for iodine atom, (SMD= Water) level of theory.....                                           | 12        |
| <b>Table S20.</b> Enthalpy ( $\Delta H$ [kJ/mol]) computed at the CAM-B3LYP/6-311+G(2d,p), DGDZVP for iodine atom, (SMD= Water) level of theory.....                                        | 12        |
| <b>Table S21.</b> Enthalpy ( $\Delta H$ [kJ/mol]) computed at the $\omega$ B97XD/6-311+G(2d,p), DGDZVP for iodine atom, (SMD= Water) level of theory.....                                   | 12        |
| <b>Table S22.</b> Enthalpy ( $\Delta H$ [kJ/mol]) computed at the BMK/6-311+G(2d,p), DGDZVP for iodine atom, (SMD= Water) level of theory.....                                              | 13        |
| <b>Table S23.</b> Total energy ( $\Delta E$ [kJ/mol]) computed at the B3PW91/6-311+G(2d,p), DGDZVP for iodine atom, (SMD= Water ) level of theory.....                                      | 13        |
| <b>Table S24.</b> Total energy ( $\Delta E$ [kJ/mol]) computed at the CAM-B3LYP/6-311+G(2d,p), DGDZVP for iodine atom, (SMD= Water) level of theory.....                                    | 13        |
| <b>Table S 25.</b> Total energy ( $\Delta E$ [kJ/mol]) computed at the $\omega$ B97XD/6-311+G(2d,p), DGDZVP for iodine atom, (SMD= Water) level of theory.....                              | 14        |
| <b>Table S26.</b> Total energy ( $\Delta E$ [kJ/mol]) computed at the BMK/6-311+G(2d,p), DGDZVP for iodine atom, (SMD= Water) level of theory.....                                          | 14        |
| <b>3. Cartesian coordinates and thermochemistry.....</b>                                                                                                                                    | <b>16</b> |
| <b>Table S27.</b> Molecular geometries optimized at the B3PW91/6-311+G(2d,p), (SMD=Water) level of theory.....                                                                              | 16        |
| <b>4. Topological analysis based on QTAIM.....</b>                                                                                                                                          | <b>30</b> |
| <b>Table S28.</b> Calculated bond distances ( $d$ , Å), electronic charge densities at BCP ( $\rho$ , a.u.) for IC2_C and TS3_C structures.....                                             | 30        |
| <b>Table S29.</b> Calculated bond angles ( $\angle$ , °), in IC2_C and TS3_C structures.....                                                                                                | 31        |
| <b>Table S30.</b> Calculated electron density derivatives for TS3_C structure.....                                                                                                          | 32        |
| <b>Table S31.</b> Calculated electron density derivatives for IC2_C structure.....                                                                                                          | 33        |
| <b>5. Bibliography.....</b>                                                                                                                                                                 | <b>34</b> |

## 1. Computation methodology description and rationalization.

Four density functional theory (DFT) methods were applied to determine the kinetic and thermodynamic properties of the Malaprade reaction mechanism: B3PW91[1, 2], CAM-B3LYP,[3] BMK[4] and  $\omega$ B97XD[5]. The B3PW91[1, 2] was chosen as one of the most popular hybrid DFT functionals that can properly reproduce a wide scope of molecular properties.[6, 7] The CAM-B3LYP functional was chosen because of its known ability to reproduce a long-range interaction as it combines the hybrid qualities of B3LYP for charge transfer systems.[3, 8] The BMK functional was chosen for kinetic calculations, as the one that yields good to excellent results while used for studying organic reactions.[9-11] The  $\omega$ B97XD[5] functional was chosen to describe the dispersion effects in the atomic system with non-covalent, week interactions. The input files containing the appropriate molecular geometries (the location of the atoms in 3D space) were constructed and define in Cartesian coordinates type of notification, using GaussView software. During optimization process at each step of the computations, the “opt=Cartesian” option was never used.

The localization of the first-order saddle points/transition states was performed according to the following strategy:

1. Optimized substrate or intermediate structures were used to perform the redundant scan-type computations, in which selected interatomic distances were increased or decreased, forcing the interaction between atomic reaction sites. The classic Gaussian commend was used for this purposes: opt=modredundant.
2. The scan-type computations result in the energy diagram in a function of interatomic distances. The approximate bell shape of the energy curve indicates the energy maximum point which was then selected for the ultimate transition state optimization.
3. Using standards Gaussian command: opt=(calcfc, ts, noeigen). The molecular geometry taken from point 2 was used and frequency analysis was performed on top of this computations with Gaussian command freq. The one imaginary frequency defines the proper localization of the first-saddle point, the transition state.
4. The additional IRC analysis were performed with the final transition state structure in both directions (Gaussian command: irc=(reverse, maxpoints=500, calcfc) and irc=(forward, maxpoints=500, calcfc). In result of this analysis, the products and substrates structures were confirmed.

In addition, the unrestricted DFT computations were performed using a valence triple- $\zeta$  basis set (6-311+G(2d,p))[12] including diffuse and polarization functions on oxygen and carbon atoms, and polarization functions for hydrogen. In addition, the only full-electron type of basis set: DGDZVP[13, 14] was used to describe all electrons in iodine atom. In order to perform a brief comparison on what extent the computer time can be limited during computation also Weigend's effective core potential (ECP) (DEF2-TZVP)[15, 16], was applied for the iodine atom in parallel.

Based on all the methods used in the study, with both effective core potential (ECP) (DEF2-TZVP) and full basis set (DGDZVP) describing the electronic structure for iodine atom, the same mechanistic picture can be drawn and comparable trends along the potential energy surface, from substrates to products are preserved. However, application of the full basis set (DGDZVP) describing all electrons of the iodine atom lowers the average transition state energies by c.a. 10-20% in comparison with the results given by ECP (DEF2-TZVP) for iodine atom. Computed mean standard deviation for all Relative Gibbs free energy ( $\Delta G$  [kJ/mol]) is to be c.a. 16 kJ/mol. All the methods provide consistent reaction kinetic information, being in good agreement with experimental values. The rate limiting step of the reaction

(TS2\_C) has been located computationally between 93-134 kJ/mol (see Fig. SI1/SI2 and Table S1/S2), while experimentalists provides the energy regime for the Malaprade process to be within 97-168 kJ/mol with unknown measurement error.[17, 18]

**Figure SI 1:** Comparison of method performance for transition state structures.

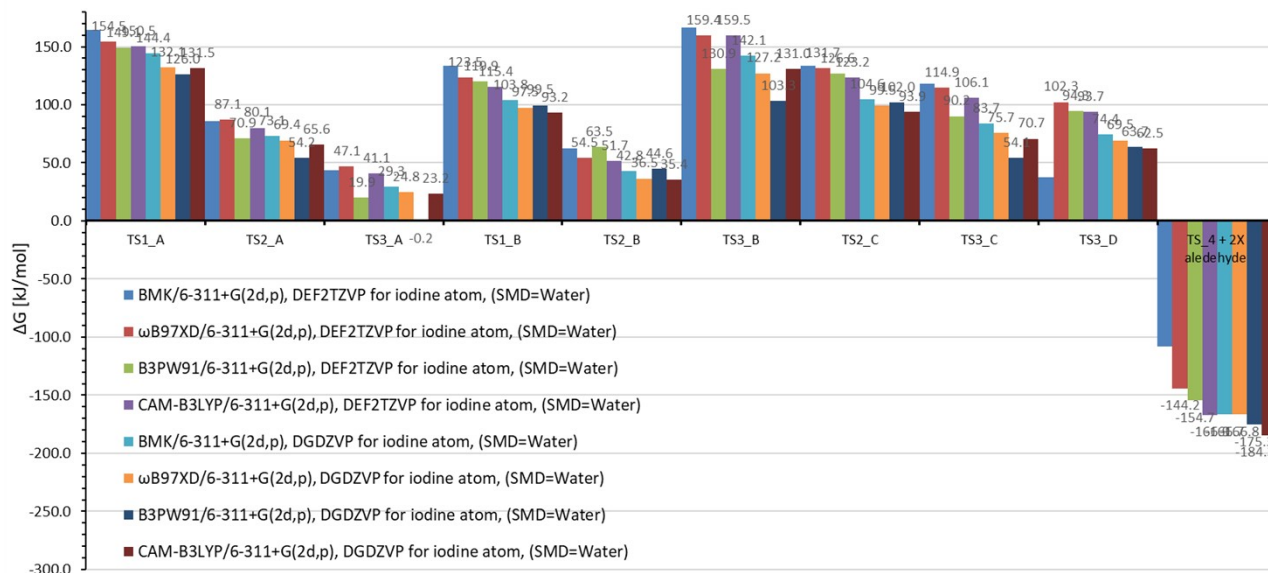

**Figure SI 2:** Comparison of method performance for intermediate structures.

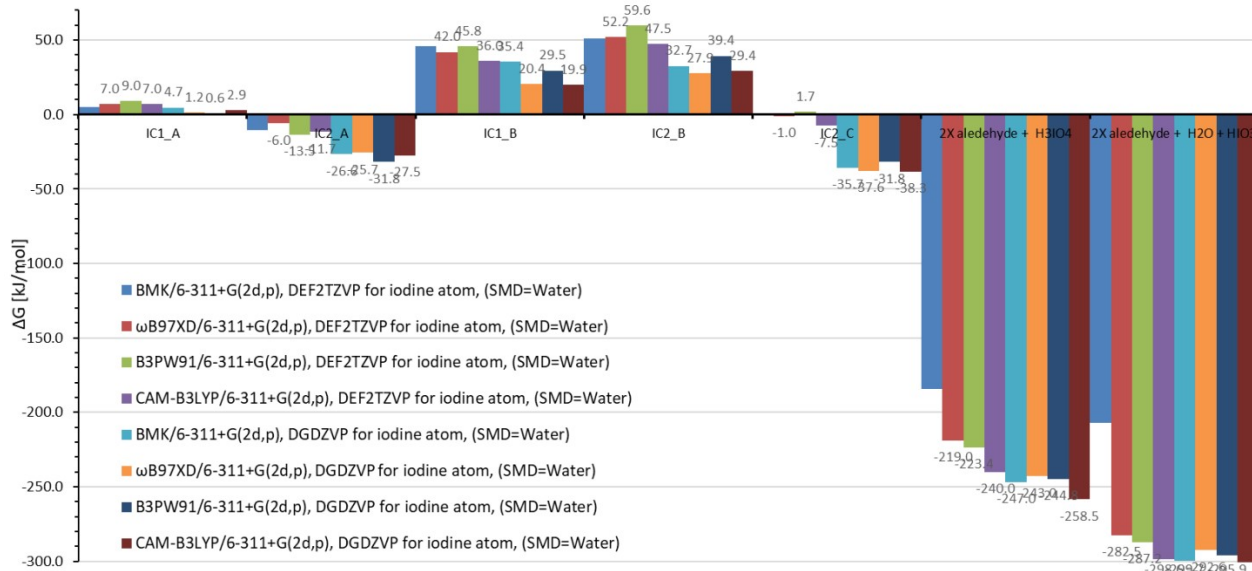

**Table S1.** Comparison of computed Relative Gibbs free energy ( $\Delta G$  [kJ/mol]) computed for transition state structures, using different DFT methods.

| Method:                                                              | $\Delta G$ [kJ/mol] |       |       |       |       |       |       |       |       |                    | Mean SD: |
|----------------------------------------------------------------------|---------------------|-------|-------|-------|-------|-------|-------|-------|-------|--------------------|----------|
|                                                                      | TS1_A               | TS2_A | TS3_A | TS1_B | TS2_B | TS3_B | TS2_C | TS3_C | TS3_D | TS_4 + 2X aldehyde |          |
| BMK/6-311+G(2d,p), def2-TZVP for iodine atom, (SMD=Water)            | 164.6               | 86.1  | 43.3  | 133.5 | 62.2  | 166.6 | 133.8 | 118.1 | 37.3  | -108.0             |          |
| $\omega$ B97XD/6-311+G(2d,p), def2-TZVP for iodine atom, (SMD=Water) | 154.5               | 87.1  | 47.1  | 123.5 | 54.5  | 159.4 | 131.7 | 114.9 | 102.3 | -144.2             |          |
| B3PW91/6-311+G(2d,p), def2-TZVP for iodine atom, (SMD=Water)         | 149.1               | 70.9  | 19.9  | 119.9 | 63.5  | 130.9 | 126.6 | 90.2  | 94.3  | -154.7             |          |
| CAM-B3LYP/6-311+G(2d,p), def2-TZVP for iodine atom, (SMD=Water)      | 150.5               | 80.1  | 41.1  | 115.4 | 51.7  | 159.5 | 123.2 | 106.1 | 93.7  | -166.9             |          |
| BMK/6-311+G(2d,p), DGDZVP for iodine atom, (SMD=Water)               | 144.4               | 73.1  | 29.3  | 103.8 | 42.8  | 142.1 | 104.6 | 83.7  | 74.4  | -166.7             |          |
| $\omega$ B97XD/6-311+G(2d,p), DGDZVP for iodine atom, (SMD=Water)    | 132.1               | 69.4  | 24.8  | 97.5  | 36.5  | 127.2 | 99.5  | 75.7  | 69.5  | -166.8             |          |
| B3PW91/6-311+G(2d,p), DGDZVP for iodine atom, (SMD=Water)            | 126.0               | 54.2  | -0.2  | 99.5  | 44.6  | 103.3 | 102.0 | 54.1  | 63.7  | -175.3             |          |
| CAM-B3LYP/6-311+G(2d,p), DGDZVP for iodine atom, (SMD=Water)         | 131.5               | 65.6  | 23.2  | 93.2  | 35.4  | 131.0 | 93.9  | 70.7  | 62.5  | -184.3             |          |
| <b>Standard deviation, SD</b>                                        | 11.1                | 10.5  | 15.4  | 11.9  | 10.2  | 19.7  | 15.1  | 20.9  | 16.4  | 13.1               | 14.4     |

**Table S2.** Comparison of computed Relative Gibbs free energy ( $\Delta G$  [kJ/mol]) computed for intermediate structures, using different DFT methods.

| Method:                                                              | $\Delta G$ [kJ/mol] |       |       |       |       |                     |                          |  |
|----------------------------------------------------------------------|---------------------|-------|-------|-------|-------|---------------------|--------------------------|--|
|                                                                      | IC1_A               | IC2_A | IC1_B | IC2_B | IC2_C | 2X aldehyde + H3IO4 | 2X aldehyde + H2O + HIO3 |  |
| BMK/6-311+G(2d,p), def2-TZVP for iodine atom, (SMD=Water)            | 5.1                 | -10.6 | 45.7  | 51.3  | 0.0   | -184.5              | -207.0                   |  |
| $\omega$ B97XD/6-311+G(2d,p), def2-TZVP for iodine atom, (SMD=Water) | 7.0                 | -6.0  | 42.0  | 52.2  | -1.0  | -219.0              | -282.5                   |  |
| B3PW91/6-311+G(2d,p), def2-TZVP for iodine atom, (SMD=Water)         | 9.0                 | -13.5 | 45.8  | 59.6  | 1.7   | -223.4              | -287.2                   |  |
| CAM-B3LYP/6-311+G(2d,p), def2-TZVP for iodine atom, (SMD=Water)      | 7.0                 | -11.7 | 36.0  | 47.5  | -7.5  | -240.0              | -298.6                   |  |
| BMK/6-311+G(2d,p), DGDZVP for iodine atom, (SMD=Water)               | 4.7                 | -26.6 | 35.4  | 32.7  | -35.7 | -247.0              | -299.7                   |  |
| $\omega$ B97XD/6-311+G(2d,p), DGDZVP for iodine atom, (SMD=Water)    | 1.2                 | -25.7 | 20.4  | 27.9  | -37.6 | -243.0              | -292.6                   |  |
| B3PW91/6-311+G(2d,p), DGDZVP for iodine atom, (SMD=Water)            | 0.6                 | -31.8 | 29.5  | 39.4  | -31.8 | -244.8              | -295.9                   |  |
| CAM-B3LYP/6-311+G(2d,p), DGDZVP for iodine atom, (SMD=Water)         | 2.9                 | -27.5 | 19.9  | 29.4  | -38.3 | -258.5              | -303.9                   |  |

---

|                               |     |     |      |      |      |      |     | <b>Mean<br/>SD:</b> |
|-------------------------------|-----|-----|------|------|------|------|-----|---------------------|
| <b>Standard deviation, SD</b> | 3.2 | 9.8 | 10.0 | 12.2 | 18.3 | 13.8 | 7.5 | 10.7                |

---

## 2. Kinetic and thermodynamic properties

**Table S3.** Relative Gibbs free energy ( $\Delta G$  [kJ/mol]) computed at the B3PW91/6-311+G(2d,p), def2-TZVP for iodine atom, (SMD=Water) (SMD=Water) level of theory.

|                     | Substrates   | TS1_A        | IC1_A                      | TS2_A                     | IC2_A        | TS3_A                           |
|---------------------|--------------|--------------|----------------------------|---------------------------|--------------|---------------------------------|
| $\Delta G$ [kJ/mol] | 0.0          | 149.1        | 9.0                        | 70.9                      | -13.5        | 19.9                            |
|                     |              | <b>TS1_B</b> | <b>IC1_B</b>               | <b>TS2_B</b>              | <b>IC2_B</b> | <b>TS3_B</b>                    |
|                     |              | 119.9        | 45.8                       | 63.5                      | 59.6         | 130.9                           |
|                     |              | <b>TS2_C</b> | <b>IC2_C</b>               | <b>TS3_C</b>              |              |                                 |
|                     |              | 126.6        | 1.7                        | 90.2                      |              |                                 |
|                     | <b>TS3_D</b> |              | <b>2X aldehyde + H3IO4</b> | <b>TS_4 + 2X aldehyde</b> |              | <b>2X aldehyde + H2O + HIO3</b> |
|                     |              | 94.3         |                            | -223.4                    | -154.7       | -287.2                          |

**Table S4.** Relative Gibbs free energy ( $\Delta G$  [kJ/mol]) computed at the CAM-B3LYP/6-311+G(2d,p), def2-TZVP for iodine atom, (SMD=Water) level of theory.

|                     | Substrates   | TS1_A        | IC1_A                      | TS2_A                     | IC2_A        | TS3_A                           |
|---------------------|--------------|--------------|----------------------------|---------------------------|--------------|---------------------------------|
| $\Delta G$ [kJ/mol] | 0.0          | 150.5        | 7.0                        | 80.1                      | -11.7        | 41.1                            |
|                     |              | <b>TS1_B</b> | <b>IC1_B</b>               | <b>TS2_B</b>              | <b>IC2_B</b> | <b>TS3_B</b>                    |
|                     |              | 115.4        | 36.0                       | 51.7                      | 47.5         | 159.5                           |
|                     |              | <b>TS2_C</b> | <b>IC2_C</b>               | <b>TS3_C</b>              |              |                                 |
|                     |              | 123.2        | -7.5                       | 106.1                     |              |                                 |
|                     | <b>TS3_D</b> |              | <b>2X aldehyde + H3IO4</b> | <b>TS_4 + 2X aldehyde</b> |              | <b>2X aldehyde + H2O + HIO3</b> |
|                     |              | 93.7         |                            | -240.0                    | -166.9       | -298.6                          |

**Table S5.** Relative Gibbs free energy ( $\Delta G$  [kJ/mol]) computed at the  $\omega$ B97XD/6-311+G(2d,p), def2-TZVP for iodine atom, (SMD= Water) level of theory.

|                     | Substrates | TS1_A        | IC1_A        | TS2_A        | IC2_A        | TS3_A        |
|---------------------|------------|--------------|--------------|--------------|--------------|--------------|
| $\Delta G$ [kJ/mol] | 0.0        | 154.5        | 7.0          | 87.1         | -6.0         | 47.1         |
|                     |            | <b>TS1_B</b> | <b>IC1_B</b> | <b>TS2_B</b> | <b>IC2_B</b> | <b>TS3_B</b> |
|                     |            | 123.5        | 42.0         | 54.5         | 52.2         | 159.4        |

|  |              |              |                            |                           |                                 |
|--|--------------|--------------|----------------------------|---------------------------|---------------------------------|
|  | <b>TS2_C</b> | <b>IC2_C</b> | <b>TS3_C</b>               |                           |                                 |
|  | 131.7        | -1.0         | 114.9                      |                           |                                 |
|  | <b>TS3_D</b> |              | <b>2X aldehyde + H3IO4</b> | <b>TS_4 + 2X aldehyde</b> | <b>2X aldehyde + H2O + HIO3</b> |
|  | 102.3        |              | -219.0                     | -144.2                    | -282.5                          |

**Table S6.** Relative Gibbs free energy ( $\Delta G$  [kJ/mol]) computed at the BMK/6-311+G(2d,p), def2-TZVP for iodine atom, (SMD= Water) level of theory.

|                     | <b>Substrates</b> | <b>TS1_A</b> | <b>IC1_A</b> | <b>TS2_A</b>               | <b>IC2_A</b>              | <b>TS3_A</b>                    |
|---------------------|-------------------|--------------|--------------|----------------------------|---------------------------|---------------------------------|
| $\Delta G$ [kJ/mol] | 0.0               | 164.6        | 5.1          | 86.1                       | -10.6                     | 43.3                            |
|                     |                   | <b>TS1_B</b> | <b>IC1_B</b> | <b>TS2_B</b>               | <b>IC2_B</b>              | <b>TS3_B</b>                    |
|                     |                   | 133.5        | 45.7         | 62.2                       | 51.3                      | 166.6                           |
|                     |                   | <b>TS2_C</b> | <b>IC2_C</b> | <b>TS3_C</b>               |                           |                                 |
|                     |                   | 133.8        | 0.0          | 118.1                      |                           |                                 |
|                     |                   | <b>TS3_D</b> |              | <b>2X aldehyde + H3IO4</b> | <b>TS_4 + 2X aldehyde</b> | <b>2X aldehyde + H2O + HIO3</b> |
|                     |                   | 105.2        |              | -232.0                     | -154.6                    | -298.2                          |

**Table S7.** Enthalpy ( $\Delta H$  [kJ/mol]) computed at the B3PW91/6-311+G(2d,p), def2-TZVP for iodine atom, (SMD= Water) level of theory.

|                     | <b>Substrates</b> | <b>TS1_A</b> | <b>IC1_A</b> | <b>TS2_A</b>               | <b>IC2_A</b>              | <b>TS3_A</b>                    |
|---------------------|-------------------|--------------|--------------|----------------------------|---------------------------|---------------------------------|
| $\Delta H$ [kJ/mol] | 0.0               | 82.9         | -4.7         | 51.4                       | -29.7                     | 8.1                             |
|                     |                   | <b>TS1_B</b> | <b>IC1_B</b> | <b>TS2_B</b>               | <b>IC2_B</b>              | <b>TS3_B</b>                    |
|                     |                   | 58.5         | -9.6         | 6.8                        | 3.3                       | 76.0                            |
|                     |                   | <b>TS2_C</b> | <b>IC2_C</b> | <b>TS3_C</b>               |                           |                                 |
|                     |                   | 58.7         | -61.3        | 35.3                       |                           |                                 |
|                     |                   | <b>TS3_D</b> |              | <b>2X aldehyde + H3IO4</b> | <b>TS_4 + 2X aldehyde</b> | <b>2X aldehyde + H2O + HIO3</b> |
|                     |                   | 28.4         |              | -174.6                     | -107.7                    | -195.4                          |

**Table S8.** Enthalpy ( $\Delta H$  [kJ/mol]) computed at the CAM-B3LYP/6-311+G(2d,p), (SMD= Water) level of theory.

|  | <b>Substrates</b> | <b>TS1_A</b> | <b>IC1_A</b> | <b>TS2_A</b> | <b>IC2_A</b> | <b>TS3_A</b> |
|--|-------------------|--------------|--------------|--------------|--------------|--------------|
|--|-------------------|--------------|--------------|--------------|--------------|--------------|



|                     |     |              |                            |                           |                                 |              |
|---------------------|-----|--------------|----------------------------|---------------------------|---------------------------------|--------------|
| $\Delta H$ [kJ/mol] | 0.0 | 86.2         | -4.3                       | 61.9                      | -27.1                           | 30.6         |
|                     |     | <b>TS1_B</b> | <b>IC1_B</b>               | <b>TS2_B</b>              | <b>IC2_B</b>                    | <b>TS3_B</b> |
|                     |     | 55.6         | -20.9                      | -4.6                      | -7.9                            | 105.4        |
|                     |     | <b>TS2_C</b> | <b>IC2_C</b>               | <b>TS3_C</b>              |                                 |              |
|                     |     | 56.0         | -70.3                      | 50.3                      |                                 |              |
|                     |     | <b>TS3_D</b> | <b>2X aldehyde + H3IO4</b> | <b>TS_4 + 2X aldehyde</b> | <b>2X aldehyde + H2O + HIO3</b> |              |
|                     |     | 28.5         | -190.2                     | -118.0                    | -205.1                          |              |

**Table S9.** Enthalpy ( $\Delta H$  [kJ/mol]) computed at the  $\omega$ B97XD/6-311+G(2d,p), def2-TZVP for iodine atom, (SMD= Water) level of theory.

|                     | <b>Substrates</b> | <b>TS1_A</b> | <b>IC1_A</b>               | <b>TS2_A</b>              | <b>IC2_A</b>                    | <b>TS3_A</b> |
|---------------------|-------------------|--------------|----------------------------|---------------------------|---------------------------------|--------------|
| $\Delta H$ [kJ/mol] | 0.0               | 87.7         | -6.0                       | 66.5                      | -24.0                           | 34.0         |
|                     |                   | <b>TS1_B</b> | <b>IC1_B</b>               | <b>TS2_B</b>              | <b>IC2_B</b>                    | <b>TS3_B</b> |
|                     |                   | 60.5         | -18.4                      | -4.4                      | -7.2                            | 104.3        |
|                     |                   | <b>TS2_C</b> | <b>IC2_C</b>               | <b>TS3_C</b>              |                                 |              |
|                     |                   | 62.0         | -66.5                      | 56.7                      |                                 |              |
|                     |                   | <b>TS3_D</b> | <b>2X aldehyde + H3IO4</b> | <b>TS_4 + 2X aldehyde</b> | <b>2X aldehyde + H2O + HIO3</b> |              |
|                     |                   | 34.7         | -171.4                     | -97.6                     | -191.4                          |              |

**Table S10.** Enthalpy ( $\Delta H$  [kJ/mol]) computed at the BMK/6-311+G(2d,p), def2-TZVP for iodine atom, (SMD= Water) level of theory.

|                     | <b>Substrates</b> | <b>TS1_A</b> | <b>IC1_A</b>               | <b>TS2_A</b>              | <b>IC2_A</b>                    | <b>TS3_A</b> |
|---------------------|-------------------|--------------|----------------------------|---------------------------|---------------------------------|--------------|
| $\Delta H$ [kJ/mol] | 0.0               | 96.5         | -8.2                       | 65.6                      | -28.4                           | 30.2         |
|                     |                   | <b>TS1_B</b> | <b>IC1_B</b>               | <b>TS2_B</b>              | <b>IC2_B</b>                    | <b>TS3_B</b> |
|                     |                   | 70.3         | -13.6                      | 0.5                       | -4.1                            | 110.4        |
|                     |                   | <b>TS2_C</b> | <b>IC2_C</b>               | <b>TS3_C</b>              |                                 |              |
|                     |                   | 64.1         | -65.4                      | 60.0                      |                                 |              |
|                     |                   | <b>TS3_D</b> | <b>2X aldehyde + H3IO4</b> | <b>TS_4 + 2X aldehyde</b> | <b>2X aldehyde + H2O + HIO3</b> |              |
|                     |                   | 37.3         | -184.5                     | -108.0                    | -207.0                          |              |

**Table S11.** Total energy ( $\Delta E$  [kJ/mol]) computed at the B3PW91/6-311+G(2d,p), def2-TZVP for iodine atom, (SMD= Water ) level of theory.

|                     | Substrates | TS1_A | IC1_A               | TS2_A              | IC2_A | TS3_A                    |
|---------------------|------------|-------|---------------------|--------------------|-------|--------------------------|
| $\Delta E$ [kJ/mol] | 0.0        | 88.6  | -6.1                | 52.4               | -30.3 | 5.8                      |
|                     |            | TS1_B | IC1_B               | TS2_B              | IC2_B | TS3_B                    |
|                     |            | 63.4  | -7.1                | 10.1               | 5.6   | 77.4                     |
|                     |            | TS2_C | IC2_C               | TS3_C              |       |                          |
|                     |            | 64.8  | -57.6               | 36.0               |       |                          |
|                     |            | TS3_D | 2X aldehyde + H3IO4 | TS_4 + 2X aldehyde |       | 2X aldehyde + H2O + HIO3 |
|                     |            | 34.0  | -180.8              | -112.5             |       | -204.6                   |

**Table S12.** Total energy ( $\Delta E$  [kJ/mol]) computed at the CAM-B3LYP/6-311+G(2d,p), def2-TZVP for iodine atom, (SMD= Water) level of theory.

|                     | Substrates | TS1_A | IC1_A               | TS2_A              | IC2_A | TS3_A                    |
|---------------------|------------|-------|---------------------|--------------------|-------|--------------------------|
| $\Delta E$ [kJ/mol] | 0.0        | 91.5  | -6.5                | 62.5               | -27.9 | 27.9                     |
|                     |            | TS1_B | IC1_B               | TS2_B              | IC2_B | TS3_B                    |
|                     |            | 60.0  | -18.4               | -1.4               | -5.6  | 106.4                    |
|                     |            | TS2_C | IC2_C               | TS3_C              |       |                          |
|                     |            | 62.0  | -66.5               | 51.4               |       |                          |
|                     |            | TS3_D | 2X aldehyde + H3IO4 | TS_4 + 2X aldehyde |       | 2X aldehyde + H2O + HIO3 |
|                     |            | 34.0  | -196.7              | -123.5             |       | -214.9                   |

**Table S 13.** Total energy ( $\Delta E$  [kJ/mol]) computed at the  $\omega$ B97XD/6-311+G(2d,p), def2-TZVP for iodine atom, (SMD= Water) level of theory.

|                     | Substrates | TS1_A | IC1_A               | TS2_A              | IC2_A | TS3_A                    |
|---------------------|------------|-------|---------------------|--------------------|-------|--------------------------|
| $\Delta E$ [kJ/mol] | 0.0        | 93.8  | -7.7                | 67.8               | -24.0 | 32.1                     |
|                     |            | TS1_B | IC1_B               | TS2_B              | IC2_B | TS3_B                    |
|                     |            | 65.8  | -14.7               | -0.5               | -3.7  | 105.8                    |
|                     |            | TS2_C | IC2_C               | TS3_C              |       |                          |
|                     |            | 68.8  | -61.8               | 58.5               |       |                          |
|                     |            | TS3_D | 2X aldehyde + H3IO4 | TS_4 + 2X aldehyde |       | 2X aldehyde + H2O + HIO3 |

|  |      |        |        |        |
|--|------|--------|--------|--------|
|  | 40.9 | -177.3 | -102.4 | -200.5 |
|--|------|--------|--------|--------|

**Table S14.** Total energy ( $\Delta E$  [kJ/mol]) computed at the BMK/6-311+G(2d,p), def2-TZVP for iodine atom, (SMD= Water) level of theory.

|                                       | <b>Substrates</b> | <b>TS1_A</b> | <b>IC1_A</b> | <b>TS2_A</b>               | <b>IC2_A</b>              | <b>TS3_A</b>                    |
|---------------------------------------|-------------------|--------------|--------------|----------------------------|---------------------------|---------------------------------|
| <b><math>\Delta E</math> [kJ/mol]</b> | 0.0               | 102.9        | -10.1        | 66.8                       | -28.5                     | 28.2                            |
|                                       |                   | <b>TS1_B</b> | <b>IC1_B</b> | <b>TS2_B</b>               | <b>IC2_B</b>              | <b>TS3_B</b>                    |
|                                       |                   | 75.6         | -10.5        | 5.1                        | -1.2                      | 112.1                           |
|                                       |                   | <b>TS2_C</b> | <b>IC2_C</b> | <b>TS3_C</b>               |                           |                                 |
|                                       |                   | 70.8         | -60.9        | 61.7                       |                           |                                 |
|                                       |                   | <b>TS3_D</b> |              | <b>2X aldehyde + H3IO4</b> | <b>TS_4 + 2X aldehyde</b> | <b>2X aldehyde + H2O + HIO3</b> |
|                                       |                   | 43.6         |              | -190.4                     | -112.9                    | -216.3                          |

**Table S15.** Relative Gibbs free energy ( $\Delta G$  [kJ/mol]) computed at the B3PW91/6-311+G(2d,p), DGDZVP for iodine atom, (SMD=Water), (SMD=Water) (SMD=Water) level of theory.

|                                       | <b>Substrates</b> | <b>TS1_A</b> | <b>IC1_A</b> | <b>TS2_A</b>               | <b>IC2_A</b>              | <b>TS3_A</b>                    |
|---------------------------------------|-------------------|--------------|--------------|----------------------------|---------------------------|---------------------------------|
| <b><math>\Delta G</math> [kJ/mol]</b> | 0.0               | 126.0        | 0.6          | 54.2                       | -31.8                     | -0.2                            |
|                                       |                   | <b>TS1_B</b> | <b>IC1_B</b> | <b>TS2_B</b>               | <b>IC2_B</b>              | <b>TS3_B</b>                    |
|                                       |                   | 99.5         | 29.5         | 44.6                       | 39.4                      | 103.3                           |
|                                       |                   | <b>TS2_C</b> | <b>IC2_C</b> | <b>TS3_C</b>               |                           |                                 |
|                                       |                   | 102.0        | -31.8        | 54.1                       |                           |                                 |
|                                       |                   | <b>TS3_D</b> |              | <b>2X aldehyde + H3IO4</b> | <b>TS_4 + 2X aldehyde</b> | <b>2X aldehyde + H2O + HIO3</b> |
|                                       |                   | 63.7         |              | -244.8                     | -175.3                    | -295.9                          |

**Table S16.** Relative Gibbs free energy ( $\Delta G$  [kJ/mol]) computed at the CAM-B3LYP/6-311+G(2d,p), def2-TZVP for iodine atom, (SMD=Water) level of theory.

|                     | Substrates | Substrates             | TS1_A | IC1_A  | TS2_A               |      |
|---------------------|------------|------------------------|-------|--------|---------------------|------|
| $\Delta G$ [kJ/mol] | 0.0        | $\Delta G$<br>[kJ/mol] | 0.0   | 131.5  | 2.9                 | 65.6 |
|                     |            | TS1_B                  | 93.2  | 19.9   | 35.4                |      |
|                     |            | TS2_C                  | 93.9  | -38.3  | 70.7                |      |
|                     |            | TS3_D                  | 62.5  | -258.5 |                     |      |
|                     |            |                        |       |        | 2X aldehyde + H3IO4 |      |

**Table S17.** Relative Gibbs free energy ( $\Delta G$  [kJ/mol]) computed at the  $\omega$ B97XD/6-311+G(2d,p), DGDZVP for iodine atom, (SMD= Water) level of theory.

|                     | Substrates | TS1_A               | IC1_A              | TS2_A                    | IC2_A  | TS3_A |
|---------------------|------------|---------------------|--------------------|--------------------------|--------|-------|
| $\Delta G$ [kJ/mol] | 0.0        | 132.1               | 1.2                | 69.4                     | -25.7  | 24.8  |
|                     |            | TS1_B               | IC1_B              | TS2_B                    | IC2_B  | TS3_B |
|                     |            | 97.5                | 20.4               | 36.5                     | 27.9   | 127.2 |
|                     |            | TS2_C               | IC2_C              | TS3_C                    |        |       |
|                     |            | 99.5                | -37.6              | 75.7                     |        |       |
|                     |            | 2X aldehyde + H3IO4 | TS_4 + 2X aldehyde | 2X aldehyde + H2O + HIO3 |        |       |
|                     |            | 69.5                | -243.0             | -166.8                   | -292.6 |       |

**Table S18.** Relative Gibbs free energy ( $\Delta G$  [kJ/mol]) computed at the BMK/6-311+G(2d,p), DGDZVP for iodine atom, (SMD= Water) level of theory.

|                     | Substrates | TS1_A        | IC1_A                      | TS2_A                     | IC2_A                           | TS3_A        |
|---------------------|------------|--------------|----------------------------|---------------------------|---------------------------------|--------------|
| $\Delta G$ [kJ/mol] | 0.0        | 144.4        | 4.7                        | 73.1                      | -26.6                           | 29.3         |
|                     |            | <b>TS1_B</b> | <b>IC1_B</b>               | <b>TS2_B</b>              | <b>IC2_B</b>                    | <b>TS3_B</b> |
|                     |            | 103.8        | 35.4                       | 42.8                      | 32.7                            | 142.1        |
|                     |            | <b>TS2_C</b> | <b>IC2_C</b>               | <b>TS3_C</b>              |                                 |              |
|                     |            | 104.6        | -35.7                      | 83.7                      |                                 |              |
|                     |            | <b>TS3_D</b> | <b>2X aldehyde + H3IO4</b> | <b>TS_4 + 2X aldehyde</b> | <b>2X aldehyde + H2O + HIO3</b> |              |
|                     |            | 74.4         | -247.0                     | -166.7                    | -299.7                          |              |

**Table S19.** Enthalpy ( $\Delta H$  [kJ/mol]) computed at the B3PW91/6-311+G(2d,p), DGDZVP for iodine atom, (SMD= Water) level of theory.

|                     | Substrates | TS1_A        | IC1_A                      | TS2_A                     | IC2_A                           | TS3_A        |
|---------------------|------------|--------------|----------------------------|---------------------------|---------------------------------|--------------|
| $\Delta H$ [kJ/mol] | 0.0        | 58.9         | -15.7                      | 33.2                      | -49.6                           | -13.2        |
|                     |            | <b>TS1_B</b> | <b>IC1_B</b>               | <b>TS2_B</b>              | <b>IC2_B</b>                    | <b>TS3_B</b> |
|                     |            | 42.9         | -29.2                      | -13.2                     | -18.5                           | 48.1         |
|                     |            | <b>TS2_C</b> | <b>IC2_C</b>               | <b>TS3_C</b>              |                                 |              |
|                     |            | 28.4         | -95.4                      | -1.6                      |                                 |              |
|                     |            | <b>TS3_D</b> | <b>2X aldehyde + H3IO4</b> | <b>TS_4 + 2X aldehyde</b> | <b>2X aldehyde + H2O + HIO3</b> |              |
|                     |            | -2.4         | -197.0                     | -128.9                    | -203.5                          |              |

**Table S20.** Enthalpy ( $\Delta H$  [kJ/mol]) computed at the CAM-B3LYP/6-311+G(2d,p), DGDZVP for iodine atom, (SMD= Water) level of theory.

|                     | Substrates | TS1_A        | IC1_A                      | TS2_A                     | IC2_A                           | TS3_A        |
|---------------------|------------|--------------|----------------------------|---------------------------|---------------------------------|--------------|
| $\Delta H$ [kJ/mol] | 0.0        | 61.7         | -14.3                      | 43.2                      | -47.2                           | 8.4          |
|                     |            | <b>TS1_B</b> | <b>IC1_B</b>               | <b>TS2_B</b>              | <b>IC2_B</b>                    | <b>TS3_B</b> |
|                     |            | 38.1         | -40.7                      | -24.6                     | -29.0                           | 72.6         |
|                     |            | <b>TS2_C</b> | <b>IC2_C</b>               | <b>TS3_C</b>              |                                 |              |
|                     |            | 24.1         | -105.6                     | 11.3                      |                                 |              |
|                     |            | <b>TS3_D</b> | <b>2X aldehyde + H3IO4</b> | <b>TS_4 + 2X aldehyde</b> | <b>2X aldehyde + H2O + HIO3</b> |              |
|                     |            | -3.7         | -212.0                     | -138.2                    | -212.5                          |              |

**Table S21.** Enthalpy ( $\Delta H$  [kJ/mol]) computed at the  $\omega$ B97XD/6-311+G(2d,p), DGDZVP for iodine atom, (SMD= Water) level of theory.

|                     | Substrates | TS1_A        | IC1_A                      | TS2_A                     | IC2_A                           | TS3_A        |
|---------------------|------------|--------------|----------------------------|---------------------------|---------------------------------|--------------|
| $\Delta H$ [kJ/mol] | 0.0        | 62.6         | -15.2                      | 47.2                      | -45.0                           | 10.3         |
|                     |            | <b>TS1_B</b> | <b>IC1_B</b>               | <b>TS2_B</b>              | <b>IC2_B</b>                    | <b>TS3_B</b> |
|                     |            | 38.7         | -40.8                      | -24.5                     | -29.9                           | 69.9         |
|                     |            | <b>TS2_C</b> | <b>IC2_C</b>               | <b>TS3_C</b>              |                                 |              |
|                     |            | 29.1         | -103.6                     | 16.0                      |                                 |              |
|                     |            | <b>TS3_D</b> | <b>2X aldehyde + H3IO4</b> | <b>TS_4 + 2X aldehyde</b> | <b>2X aldehyde + H2O + HIO3</b> |              |
|                     |            | 1.9          | -196.3                     | -120.5                    | -201.1                          |              |

**Table S22.** Enthalpy ( $\Delta H$  [kJ/mol]) computed at the BMK/6-311+G(2d,p), DGDZVP for iodine atom, (SMD= Water) level of theory.

|                     | Substrates   | TS1_A                      | IC1_A        | TS2_A                     | IC2_A                           | TS3_A        |
|---------------------|--------------|----------------------------|--------------|---------------------------|---------------------------------|--------------|
| $\Delta H$ [kJ/mol] | 0.0          | 76.2                       | -11.4        | 51.7                      | -45.2                           | 15.8         |
|                     |              | <b>TS1_B</b>               | <b>IC1_B</b> | <b>TS2_B</b>              | <b>IC2_B</b>                    | <b>TS3_B</b> |
|                     |              | 47.9                       | -28.9        | -17.5                     | -26.5                           | 85.7         |
|                     |              | <b>TS2_C</b>               | <b>IC2_C</b> | <b>TS3_C</b>              |                                 |              |
|                     |              | 34.2                       | -100.7       | 27.6                      |                                 |              |
|                     | <b>TS3_D</b> | <b>2X aldehyde + H3IO4</b> |              | <b>TS_4 + 2X aldehyde</b> | <b>2X aldehyde + H2O + HIO3</b> |              |
|                     |              | 7.3                        |              | -199.8                    | -120.7                          | -207.2       |

**Table S23.** Total energy ( $\Delta E$  [kJ/mol]) computed at the B3PW91/6-311+G(2d,p), DGDZVP for iodine atom, (SMD= Water ) level of theory.

|                     | Substrates | TS1_A        | IC1_A                      | TS2_A        | IC2_A                     | TS3_A                           |  |
|---------------------|------------|--------------|----------------------------|--------------|---------------------------|---------------------------------|--|
| $\Delta E$ [kJ/mol] | 0.0        | <b>TS1_B</b> | <b>IC1_B</b>               | <b>TS2_B</b> | <b>IC2_B</b>              | <b>TS3_B</b>                    |  |
|                     |            | <b>TS2_C</b> | <b>IC2_C</b>               | <b>TS3_C</b> |                           |                                 |  |
|                     |            | <b>TS3_D</b> | <b>2X aldehyde + H3IO4</b> |              | <b>TS_4 + 2X aldehyde</b> | <b>2X aldehyde + H2O + HIO3</b> |  |
|                     |            |              |                            |              |                           |                                 |  |
|                     |            |              |                            |              |                           |                                 |  |

**Table S24.** Total energy ( $\Delta E$  [kJ/mol]) computed at the CAM-B3LYP/6-311+G(2d,p), DGDZVP for iodine atom, (SMD= Water) level of theory.

|                     | Substrates | TS1_A        | IC1_A        | TS2_A        | IC2_A        | TS3_A        |
|---------------------|------------|--------------|--------------|--------------|--------------|--------------|
| $\Delta E$ [kJ/mol] | 0.0        | 64.8         | -16.4        | 34.5         | -50.0        | -15.2        |
|                     |            | <b>TS1_B</b> | <b>IC1_B</b> | <b>TS2_B</b> | <b>IC2_B</b> | <b>TS3_B</b> |

|  |              |                            |                           |                                 |      |
|--|--------------|----------------------------|---------------------------|---------------------------------|------|
|  | 45.7         | -26.1                      | -9.9                      | -15.8                           | 49.6 |
|  | <b>TS2_C</b> | <b>IC2_C</b>               | <b>TS3_C</b>              |                                 |      |
|  | 34.4         | -91.7                      | -0.5                      |                                 |      |
|  | <b>TS3_D</b> | <b>2X aldehyde + H3IO4</b> | <b>TS_4 + 2X aldehyde</b> | <b>2X aldehyde + H2O + HIO3</b> |      |
|  | 3.1          | -203.0                     | -133.7                    | -213.6                          |      |

**Table S 25.** Total energy ( $\Delta E$  [kJ/mol]) computed at the  $\omega$ B97XD/6-311+G(2d,p), DGDZVP for iodine atom, (SMD= Water) level of theory.

|                     | Substrates | <b>TS1_A</b> | <b>IC1_A</b>               | <b>TS2_A</b>              | <b>IC2_A</b>                    | <b>TS3_A</b> |
|---------------------|------------|--------------|----------------------------|---------------------------|---------------------------------|--------------|
| $\Delta E$ [kJ/mol] | 0.0        | 69.2         | -16.0                      | 48.8                      | -45.0                           | 8.6          |
|                     |            | <b>TS1_B</b> | <b>IC1_B</b>               | <b>TS2_B</b>              | <b>IC2_B</b>                    | <b>TS3_B</b> |
|                     |            | 42.0         | -37.2                      | -20.4                     | -26.9                           | 71.8         |
|                     |            | <b>TS2_C</b> | <b>IC2_C</b>               | <b>TS3_C</b>              |                                 |              |
|                     |            | 35.7         | -99.2                      | 18.1                      |                                 |              |
|                     |            | <b>TS3_D</b> | <b>2X aldehyde + H3IO4</b> | <b>TS_4 + 2X aldehyde</b> | <b>2X aldehyde + H2O + HIO3</b> |              |
|                     |            | 7.8          | -202.2                     | -125.4                    | -211.1                          |              |

**Table S26.** Total energy ( $\Delta E$  [kJ/mol]) computed at the BMK/6-311+G(2d,p), DGDZVP for iodine atom, (SMD= Water) level of theory.

|                     | Substrates | <b>TS1_A</b> | <b>IC1_A</b> | <b>TS2_A</b> | <b>IC2_A</b> | <b>TS3_A</b> |
|---------------------|------------|--------------|--------------|--------------|--------------|--------------|
| $\Delta E$ [kJ/mol] | 0.0        | 82.6         | -12.1        | 53.2         | -45.2        | 13.9         |
|                     |            | <b>TS1_B</b> | <b>IC1_B</b> | <b>TS2_B</b> | <b>IC2_B</b> | <b>TS3_B</b> |
|                     |            | 51.6         | -24.0        | -13.2        | -22.6        | 87.5         |



|  |              |              |                      |                           |                            |
|--|--------------|--------------|----------------------|---------------------------|----------------------------|
|  | <b>TS2_C</b> | <b>IC2_C</b> | <b>TS3_C</b>         |                           |                            |
|  | 41.0         | -96.5        | 28.8                 |                           |                            |
|  |              |              | <b>2X aldehyde +</b> |                           | <b>2X aldehyde + H2O +</b> |
|  | <b>TS3_D</b> |              | <b>H3IO4</b>         | <b>TS_4 + 2X aldehyde</b> | <b>HIO3</b>                |
|  | 13.3         |              | -205.5               | -125.4                    | -217.4                     |

### 3. Cartesian coordinates and thermochemistry.

**Table S27.** Molecular geometries optimized at the B3PW91/6-311+G(2d,p), (SMD=Water) level of theory.

| Periodic Acid                                                                     |             |             |                    |
|-----------------------------------------------------------------------------------|-------------|-------------|--------------------|
| 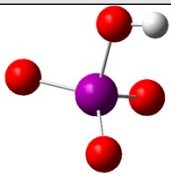 |             |             |                    |
| Thermochemistry:                                                                  |             |             |                    |
| Zero-point correction=                                                            |             | 0.021492    | (Hartree/Particle) |
| Thermal correction to Energy=                                                     |             | 0.027779    |                    |
| Thermal correction to Enthalpy=                                                   |             | 0.028723    |                    |
| Thermal correction to Gibbs Free Energy=                                          |             | -0.009618   |                    |
| Sum of electronic and zero-point Energies=                                        |             | -598.963201 |                    |
| Sum of electronic and thermal Energies=                                           |             | -598.956914 |                    |
| Sum of electronic and thermal Enthalpies=                                         |             | -598.955970 |                    |
| Sum of electronic and thermal Free Energies=                                      |             | -598.994311 |                    |
| Cartesian coordinates:                                                            |             |             |                    |
| 0 1                                                                               |             |             |                    |
| I                                                                                 | -0.07651900 | 0.01822100  | -0.00961800        |
| O                                                                                 | 1.76010000  | -0.35252100 | 0.21546300         |
| O                                                                                 | 0.01139500  | 1.71951000  | -0.44778600        |
| H                                                                                 | 1.88271500  | -1.30812800 | 0.38137500         |
| O                                                                                 | -0.65055900 | -1.03991200 | -1.29699300        |
| O                                                                                 | -0.84933700 | -0.28427600 | 1.54536300         |

| Ethane-1,2-diol (ethylene glycol)                                                   |             |             |                    |
|-------------------------------------------------------------------------------------|-------------|-------------|--------------------|
| 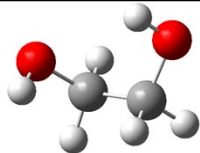 |             |             |                    |
| Thermochemistry:                                                                    |             |             |                    |
| Zero-point correction=                                                              |             | 0.085586    | (Hartree/Particle) |
| Thermal correction to Energy=                                                       |             | 0.090793    |                    |
| Thermal correction to Enthalpy=                                                     |             | 0.091737    |                    |
| Thermal correction to Gibbs Free Energy=                                            |             | 0.058115    |                    |
| Sum of electronic and zero-point Energies=                                          |             | -230.172166 |                    |
| Sum of electronic and thermal Energies=                                             |             | -230.166960 |                    |
| Sum of electronic and thermal Enthalpies=                                           |             | -230.166016 |                    |
| Sum of electronic and thermal Free Energies=                                        |             | -230.199637 |                    |
| Cartesian coordinates:                                                              |             |             |                    |
| 0 1                                                                                 |             |             |                    |
| O                                                                                   | 1.42359000  | -0.59299000 | 0.03989000         |
| C                                                                                   | 0.68278700  | 0.58193400  | -0.29322500        |
| H                                                                                   | 1.21027900  | 1.47839400  | 0.04456700         |
| C                                                                                   | -0.69971900 | 0.55873700  | 0.30441400         |
| H                                                                                   | 0.62250900  | 0.60294600  | -1.38159700        |

|   |             |             |             |
|---|-------------|-------------|-------------|
| H | -0.63165500 | 0.51069800  | 1.39655200  |
| O | -1.48121100 | -0.52927800 | -0.18420200 |
| H | -1.22912100 | 1.47282400  | 0.03434400  |
| H | -0.99875600 | -1.34469600 | 0.00241600  |
| H | 1.58931400  | -0.58605300 | 0.99107800  |

| <b>H<sub>2</sub>O</b>                                                             |            |                             |             |
|-----------------------------------------------------------------------------------|------------|-----------------------------|-------------|
| 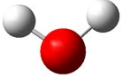 |            |                             |             |
| <b>Thermochemistry:</b>                                                           |            |                             |             |
| Zero-point correction=                                                            |            | 0.021141 (Hartree/Particle) |             |
| Thermal correction to Energy=                                                     |            | 0.023977                    |             |
| Thermal correction to Enthalpy=                                                   |            | 0.024921                    |             |
| Thermal correction to Gibbs Free Energy=                                          |            | 0.003488                    |             |
| Sum of electronic and zero-point Energies=                                        |            | -76.423491                  |             |
| Sum of electronic and thermal Energies=                                           |            | -76.420656                  |             |
| Sum of electronic and thermal Enthalpies=                                         |            | -76.419711                  |             |
| Sum of electronic and thermal Free Energies=                                      |            | -76.441145                  |             |
| <b>Cartesian coordinates:</b>                                                     |            |                             |             |
| 0 1                                                                               |            |                             |             |
| H                                                                                 | 0.00000000 | 0.76410700                  | -0.47170800 |
| H                                                                                 | 0.00000000 | -0.76410700                 | -0.47170800 |
| O                                                                                 | 0.00000000 | 0.00000000                  | 0.11792700  |

| <b>Formaldehyde</b>                                                                 |             |                             |             |
|-------------------------------------------------------------------------------------|-------------|-----------------------------|-------------|
| 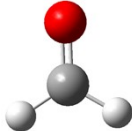 |             |                             |             |
| <b>Thermochemistry:</b>                                                             |             |                             |             |
| Zero-point correction=                                                              |             | 0.027009 (Hartree/Particle) |             |
| Thermal correction to Energy=                                                       |             | 0.029874                    |             |
| Thermal correction to Enthalpy=                                                     |             | 0.030819                    |             |
| Thermal correction to Gibbs Free Energy=                                            |             | 0.005350                    |             |
| Sum of electronic and zero-point Energies=                                          |             | -114.470612                 |             |
| Sum of electronic and thermal Energies=                                             |             | -114.467746                 |             |
| Sum of electronic and thermal Enthalpies=                                           |             | -114.466802                 |             |
| Sum of electronic and thermal Free Energies=                                        |             | -114.492271                 |             |
| <b>Cartesian coordinates:</b>                                                       |             |                             |             |
| 0 1                                                                                 |             |                             |             |
| C                                                                                   | 0.53219500  | -0.00000200                 | 0.00009500  |
| O                                                                                   | -0.67533100 | -0.00000800                 | -0.00011700 |
| H                                                                                   | 1.10467100  | 0.93956800                  | 0.00018400  |
| H                                                                                   | 1.10480600  | -0.93949000                 | 0.00018500  |

| <b>H<sub>3</sub>IO<sub>4</sub></b>                                                |                             |             |             |
|-----------------------------------------------------------------------------------|-----------------------------|-------------|-------------|
| 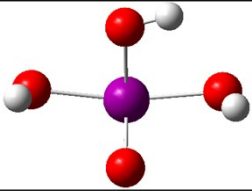 |                             |             |             |
| <b>Thermochemistry:</b>                                                           |                             |             |             |
| Zero-point correction=                                                            | 0.043773 (Hartree/Particle) |             |             |
| Thermal correction to Energy=                                                     | 0.050826                    |             |             |
| Thermal correction to Enthalpy=                                                   | 0.051770                    |             |             |
| Thermal correction to Gibbs Free Energy=                                          | 0.012517                    |             |             |
| Sum of electronic and zero-point Energies=                                        | -600.268654                 |             |             |
| Sum of electronic and thermal Energies=                                           | -600.261601                 |             |             |
| Sum of electronic and thermal Enthalpies=                                         | -600.260657                 |             |             |
| Sum of electronic and thermal Free Energies=                                      | -600.299910                 |             |             |
| <b>Cartesian coordinates:</b>                                                     |                             |             |             |
| 0 1                                                                               |                             |             |             |
| I                                                                                 | -0.01341200                 | -0.10411200 | -0.24981300 |
| O                                                                                 | 1.97637800                  | 0.03962700  | -0.20037100 |
| O                                                                                 | -0.01735300                 | -1.27624700 | 1.07722300  |
| O                                                                                 | -1.97333200                 | 0.11758300  | -0.16573900 |
| H                                                                                 | 2.31099600                  | -0.09066100 | 0.70070700  |
| H                                                                                 | -2.28902900                 | 0.14446100  | 0.75077300  |
| O                                                                                 | -0.01368900                 | 1.57053200  | 0.66717400  |
| H                                                                                 | 0.91282300                  | 1.85216900  | 0.76231000  |

| <b>HIO<sub>3</sub></b>                                                              |                             |             |             |
|-------------------------------------------------------------------------------------|-----------------------------|-------------|-------------|
| 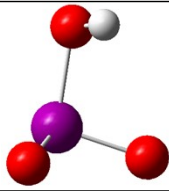 |                             |             |             |
| <b>Thermochemistry:</b>                                                             |                             |             |             |
| Zero-point correction=                                                              | 0.017835 (Hartree/Particle) |             |             |
| Thermal correction to Energy=                                                       | 0.022362                    |             |             |
| Thermal correction to Enthalpy=                                                     | 0.023306                    |             |             |
| Thermal correction to Gibbs Free Energy=                                            | -0.011110                   |             |             |
| Sum of electronic and zero-point Energies=                                          | -523.852106                 |             |             |
| Sum of electronic and thermal Energies=                                             | -523.847578                 |             |             |
| Sum of electronic and thermal Enthalpies=                                           | -523.846634                 |             |             |
| Sum of electronic and thermal Free Energies=                                        | -523.881050                 |             |             |
| <b>Cartesian coordinates:</b>                                                       |                             |             |             |
| 0 1                                                                                 |                             |             |             |
| I                                                                                   | 0.08858400                  | 0.00031600  | -0.26198300 |
| O                                                                                   | -1.74684300                 | -0.05787700 | 0.27107500  |
| O                                                                                   | 0.64539500                  | 1.41499200  | 0.64689500  |
| H                                                                                   | -1.81575800                 | 0.02063800  | 1.24058800  |
| O                                                                                   | 0.74154900                  | -1.36178800 | 0.66259600  |

**TS4**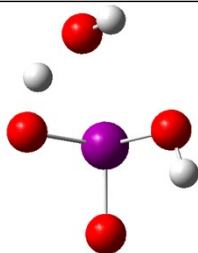**Thermochemistry:**

|                                              |                             |
|----------------------------------------------|-----------------------------|
| Zero-point correction=                       | 0.039473 (Hartree/Particle) |
| Thermal correction to Energy=                | 0.046134                    |
| Thermal correction to Enthalpy=              | 0.047078                    |
| Thermal correction to Gibbs Free Energy=     | 0.008203                    |
| Sum of electronic and zero-point Energies=   | -600.240779                 |
| Sum of electronic and thermal Energies=      | -600.234118                 |
| Sum of electronic and thermal Enthalpies=    | -600.233174                 |
| Sum of electronic and thermal Free Energies= | -600.272050                 |

**Frequency: Infrared:**

-1096.96      1974.2904

**Cartesian coordinates:**

```

0 1
I      0.20483300 -0.06234200 -0.26941800
O      -0.06801300  1.61636500  0.57855700
O       1.88215200 -0.28464000  0.26647700
O      -0.59924700 -1.18168600  0.97484100
H       0.76682400  1.85525400  1.02334600
H      -1.60836200 -0.80689700  0.64609400
O      -2.15724200  0.02741400 -0.26332100
H      -2.47580800  0.83615500  0.15726200

```

**TS1\_A**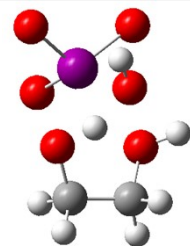**Thermochemistry:**

|                                              |                             |
|----------------------------------------------|-----------------------------|
| Zero-point correction=                       | 0.108226 (Hartree/Particle) |
| Thermal correction to Energy=                | 0.118386                    |
| Thermal correction to Enthalpy=              | 0.119330                    |
| Thermal correction to Gibbs Free Energy=     | 0.072633                    |
| Sum of electronic and zero-point Energies=   | -829.100119                 |
| Sum of electronic and thermal Energies=      | -829.089958                 |
| Sum of electronic and thermal Enthalpies=    | -829.089014                 |
| Sum of electronic and thermal Free Energies= | -829.135712                 |

|                               |             |             |             |
|-------------------------------|-------------|-------------|-------------|
| <b>Frequency: Infrared:</b>   |             |             |             |
| -1448.42                      | 2326.1320   |             |             |
| <b>Cartesian coordinates:</b> |             |             |             |
| 0 1                           |             |             |             |
| I                             | 0.62575800  | -0.05026200 | -0.10143700 |
| O                             | 0.35810800  | -0.54572300 | -1.78196000 |
| O                             | 1.81588400  | 1.25248500  | -0.19080800 |
| O                             | -1.01836900 | 1.29940700  | -0.18804000 |
| O                             | -1.37412000 | -1.27181800 | 0.27675000  |
| C                             | -2.57727000 | -0.47845400 | 0.23023200  |
| C                             | -2.25992400 | 0.72732700  | -0.62006300 |
| H                             | -2.85082400 | -0.18946800 | 1.24298400  |
| H                             | -3.37124800 | -1.06711500 | -0.22557200 |
| H                             | -2.15735100 | 0.47722900  | -1.67372500 |
| H                             | -3.02733800 | 1.48969400  | -0.49451600 |
| H                             | -0.81598100 | 1.29404000  | 0.99167300  |
| H                             | -1.29207100 | -1.70459600 | 1.14156900  |
| O                             | 1.38662300  | -1.44271100 | 0.68236900  |
| O                             | -0.07425900 | 0.66480200  | 1.77255800  |
| H                             | 0.62187100  | 1.21930600  | 2.16579700  |

|                                                                                    |                             |             |             |
|------------------------------------------------------------------------------------|-----------------------------|-------------|-------------|
| <b>IC1 A</b>                                                                       |                             |             |             |
| 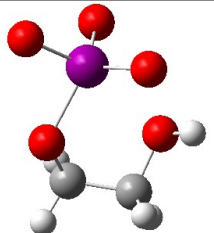 |                             |             |             |
| <b>Thermochemistry:</b>                                                            |                             |             |             |
| Zero-point correction=                                                             | 0.085203 (Hartree/Particle) |             |             |
| Thermal correction to Energy=                                                      | 0.094452                    |             |             |
| Thermal correction to Enthalpy=                                                    | 0.095396                    |             |             |
| Thermal correction to Gibbs Free Energy=                                           | 0.049941                    |             |             |
| Sum of electronic and zero-point Energies=                                         | -752.713957                 |             |             |
| Sum of electronic and thermal Energies=                                            | -752.704708                 |             |             |
| Sum of electronic and thermal Enthalpies=                                          | -752.703764                 |             |             |
| Sum of electronic and thermal Free Energies=                                       | -752.749219                 |             |             |
| <b>Cartesian coordinates:</b>                                                      |                             |             |             |
| 0 1                                                                                |                             |             |             |
| I                                                                                  | -0.61797000                 | -0.02734900 | 0.00584000  |
| O                                                                                  | -0.68017700                 | -0.47485900 | 1.70852300  |
| O                                                                                  | -1.97680700                 | 1.03892900  | -0.32837300 |
| O                                                                                  | 0.70296100                  | 1.28544500  | -0.35497600 |
| O                                                                                  | 1.66057000                  | -1.13590000 | 0.28759300  |
| C                                                                                  | 2.60678300                  | -0.20315300 | -0.24462200 |
| C                                                                                  | 2.06378200                  | 1.14486600  | 0.12578500  |
| H                                                                                  | 2.67743000                  | -0.31880700 | -1.32537700 |

|   |             |             |             |
|---|-------------|-------------|-------------|
| H | 3.58392400  | -0.35133900 | 0.21439600  |
| H | 2.06706500  | 1.30248300  | 1.20279100  |
| H | 2.60467000  | 1.94382600  | -0.37726900 |
| H | 1.59371500  | -1.90616000 | -0.29430900 |
| O | -0.68127200 | -1.32246000 | -1.18985700 |

| TS2_A                                                                             |                             |             |             |
|-----------------------------------------------------------------------------------|-----------------------------|-------------|-------------|
| 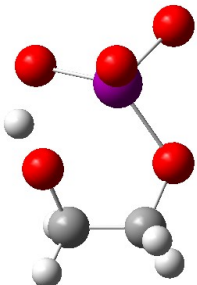 |                             |             |             |
| <b>Thermochemistry:</b>                                                           |                             |             |             |
| Zero-point correction=                                                            | 0.081319 (Hartree/Particle) |             |             |
| Thermal correction to Energy=                                                     | 0.089506                    |             |             |
| Thermal correction to Enthalpy=                                                   | 0.090450                    |             |             |
| Thermal correction to Gibbs Free Energy=                                          | 0.047604                    |             |             |
| Sum of electronic and zero-point Energies=                                        | -752.687661                 |             |             |
| Sum of electronic and thermal Energies=                                           | -752.679475                 |             |             |
| Sum of electronic and thermal Enthalpies=                                         | -752.678530                 |             |             |
| Sum of electronic and thermal Free Energies=                                      | -752.721376                 |             |             |
| <b>Frequency: Infrared:</b>                                                       |                             |             |             |
| -1607.67                                                                          | 2137.1950                   |             |             |
| <b>Cartesian coordinates:</b>                                                     |                             |             |             |
| 0 1                                                                               |                             |             |             |
| I                                                                                 | 0.53849800                  | -0.02018600 | 0.02276300  |
| O                                                                                 | 0.96970900                  | 0.09060300  | 1.72471200  |
| O                                                                                 | 1.80723000                  | -0.92630900 | -0.79252800 |
| O                                                                                 | -0.80084300                 | -1.33466200 | -0.35631300 |
| O                                                                                 | -1.28347800                 | 1.13780200  | 0.34767600  |
| C                                                                                 | -2.40826200                 | 0.44510400  | -0.17679000 |
| C                                                                                 | -2.14112900                 | -1.02750200 | 0.06845100  |
| H                                                                                 | -2.51048600                 | 0.65317000  | -1.24205100 |
| H                                                                                 | -3.30185000                 | 0.75315700  | 0.36288300  |
| H                                                                                 | -2.24097800                 | -1.28606400 | 1.12102100  |
| H                                                                                 | -2.78670900                 | -1.64571700 | -0.55134100 |
| H                                                                                 | -0.55385900                 | 1.75210000  | -0.43830600 |
| O                                                                                 | 0.57610900                  | 1.57476300  | -0.89962000 |

**IC2\_A**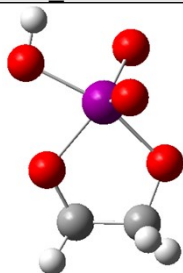**Thermochemistry:**

|                                              |                             |
|----------------------------------------------|-----------------------------|
| Zero-point correction=                       | 0.085096 (Hartree/Particle) |
| Thermal correction to Energy=                | 0.093993                    |
| Thermal correction to Enthalpy=              | 0.094937                    |
| Thermal correction to Gibbs Free Energy=     | 0.050524                    |
| Sum of electronic and zero-point Energies=   | -752.722163                 |
| Sum of electronic and thermal Energies=      | -752.713266                 |
| Sum of electronic and thermal Enthalpies=    | -752.712322                 |
| Sum of electronic and thermal Free Energies= | -752.756735                 |

**Cartesian coordinates:**

|     |             |             |             |
|-----|-------------|-------------|-------------|
| 0 1 |             |             |             |
| I   | 0.42516900  | -0.09232400 | 0.00359200  |
| O   | 1.23366500  | -0.89004400 | -1.34687600 |
| O   | 1.59387900  | 1.42073600  | 0.02055100  |
| O   | 0.80611400  | -0.66884800 | 1.62290200  |
| O   | -0.84159500 | 1.34862300  | -0.01583700 |
| O   | -1.15937000 | -1.18769500 | -0.25166400 |
| C   | -2.33754400 | -0.51365900 | 0.18774400  |
| C   | -2.20028900 | 0.93729900  | -0.23693100 |
| H   | -2.43600700 | -0.60979600 | 1.26937900  |
| H   | -3.18263600 | -0.97689800 | -0.31564200 |
| H   | -2.42467000 | 1.06888700  | -1.29358600 |
| H   | -2.81935500 | 1.58250000  | 0.38191800  |
| H   | 2.49417300  | 1.10445300  | -0.16993300 |

**TS3\_A**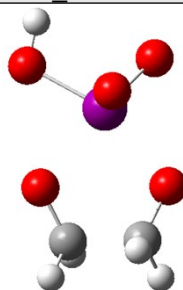**Thermochemistry:**

|                                            |                             |
|--------------------------------------------|-----------------------------|
| Zero-point correction=                     | 0.081026 (Hartree/Particle) |
| Thermal correction to Energy=              | 0.090446                    |
| Thermal correction to Enthalpy=            | 0.091390                    |
| Thermal correction to Gibbs Free Energy=   | 0.045643                    |
| Sum of electronic and zero-point Energies= | -752.700843                 |



|                                              |                                     |
|----------------------------------------------|-------------------------------------|
| Sum of electronic and thermal Energies=      | -752.691424                         |
| Sum of electronic and thermal Enthalpies=    | -752.690479                         |
| Sum of electronic and thermal Free Energies= | -752.736226                         |
| <b>Frequency: Infrared:</b>                  |                                     |
| -713.93 1691.0683                            |                                     |
| <b>Cartesian coordinates:</b>                |                                     |
| 0 1                                          |                                     |
| I                                            | 0.48315800 -0.06884900 -0.01011100  |
| O                                            | 1.54859700 -1.16575900 -0.90799100  |
| O                                            | -1.12830900 1.43108200 -0.03568800  |
| O                                            | -1.22945400 -1.32532600 -0.29310200 |
| C                                            | -2.37284900 -0.80435100 0.08852300  |
| C                                            | -2.34283700 0.96784700 -0.19273700  |
| H                                            | -2.58066400 -0.88052400 1.15485500  |
| H                                            | -3.19410200 -1.01535100 -0.59432800 |
| H                                            | -2.73653300 1.06405100 -1.20372800  |
| H                                            | -3.01465200 1.20494800 0.63284200   |
| O                                            | 1.49163700 1.54005700 -0.26904400   |
| H                                            | 2.42100500 1.29821700 -0.43077800   |
| O                                            | 0.79149000 -0.35547100 1.70611500   |

|                                                                                    |                                     |
|------------------------------------------------------------------------------------|-------------------------------------|
| <b>TS1_B</b>                                                                       |                                     |
| 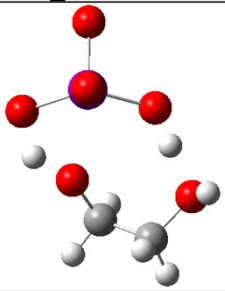 |                                     |
| <b>Thermochemistry:</b>                                                            |                                     |
| Zero-point correction=                                                             | 0.105481 (Hartree/Particle)         |
| Thermal correction to Energy=                                                      | 0.115991                            |
| Thermal correction to Enthalpy=                                                    | 0.116935                            |
| Thermal correction to Gibbs Free Energy=                                           | 0.068496                            |
| Sum of electronic and zero-point Energies=                                         | -829.112109                         |
| Sum of electronic and thermal Energies=                                            | -829.101600                         |
| Sum of electronic and thermal Enthalpies=                                          | -829.100655                         |
| Sum of electronic and thermal Free Energies=                                       | -829.149094                         |
| <b>Frequency: Infrared:</b>                                                        |                                     |
| -1486.28 2462.5668                                                                 |                                     |
| <b>Cartesian coordinates:</b>                                                      |                                     |
| 0 1                                                                                |                                     |
| I                                                                                  | 0.83869900 -0.05516400 0.03154100   |
| O                                                                                  | 0.85870700 -0.36050900 1.76624600   |
| O                                                                                  | 1.04319200 1.70316300 -0.49978900   |
| O                                                                                  | -2.58750100 -1.29108500 -0.10710900 |
| O                                                                                  | -0.98078700 1.15118400 0.37859900   |
| C                                                                                  | -2.20082300 1.07166300 -0.36237500  |

|   |             |             |             |
|---|-------------|-------------|-------------|
| C | -3.11904100 | 0.02005700  | 0.18737200  |
| H | -1.99571300 | 0.89378600  | -1.42090100 |
| H | -2.68962100 | 2.04307000  | -0.26729400 |
| H | -3.22754000 | 0.12896700  | 1.26530000  |
| H | -4.09597600 | 0.10933600  | -0.28799600 |
| H | -2.67754000 | -1.86574700 | 0.66441600  |
| H | -0.07607700 | 1.87391900  | -0.14154600 |
| O | 2.35265100  | -0.69766400 | -0.60076300 |
| O | -0.25212500 | -1.20064400 | -0.92379300 |
| H | -1.24248400 | -1.24554100 | -0.54076600 |

| <b>IC1_B</b>                                                                      |                             |             |             |
|-----------------------------------------------------------------------------------|-----------------------------|-------------|-------------|
| 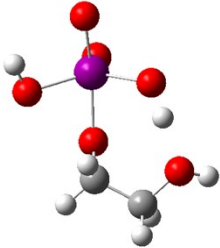 |                             |             |             |
| <b>Thermochemistry:</b>                                                           |                             |             |             |
| Zero-point correction=                                                            | 0.110266 (Hartree/Particle) |             |             |
| Thermal correction to Energy=                                                     | 0.121504                    |             |             |
| Thermal correction to Enthalpy=                                                   | 0.122448                    |             |             |
| Thermal correction to Gibbs Free Energy=                                          | 0.072900                    |             |             |
| Sum of electronic and zero-point Energies=                                        | -829.141968                 |             |             |
| Sum of electronic and thermal Energies=                                           | -829.130730                 |             |             |
| Sum of electronic and thermal Enthalpies=                                         | -829.129786                 |             |             |
| Sum of electronic and thermal Free Energies=                                      | -829.179334                 |             |             |
| <b>Cartesian coordinates:</b>                                                     |                             |             |             |
| 0 1                                                                               |                             |             |             |
| I                                                                                 | 0.71523000                  | -0.09939100 | -0.00416700 |
| O                                                                                 | 0.76433000                  | -0.94261400 | 1.54646800  |
| O                                                                                 | 1.77566300                  | 1.37278400  | 0.63378500  |
| O                                                                                 | -2.74882400                 | -0.94594000 | 0.31407900  |
| O                                                                                 | -0.61356000                 | 1.25709300  | -0.12625300 |
| C                                                                                 | -1.94319400                 | 1.09600200  | -0.69400300 |
| C                                                                                 | -2.92774900                 | 0.47593000  | 0.25464500  |
| H                                                                                 | -1.88360800                 | 0.55938200  | -1.63809200 |
| H                                                                                 | -2.23784600                 | 2.12610400  | -0.89196400 |
| H                                                                                 | -2.81681800                 | 0.90765700  | 1.24918800  |
| H                                                                                 | -3.93114900                 | 0.69547900  | -0.11638600 |
| H                                                                                 | -2.88674200                 | -1.25148900 | 1.21855500  |
| H                                                                                 | 1.39277100                  | 1.72282000  | 1.45615000  |
| O                                                                                 | 1.89473200                  | -0.33129700 | -1.29344200 |
| O                                                                                 | -0.44608600                 | -1.35463200 | -0.83296800 |
| H                                                                                 | -1.32819300                 | -1.36698000 | -0.35381900 |

**TS2\_B**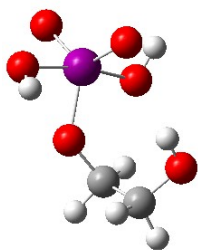**Thermochemistry:**

|                                              |                             |
|----------------------------------------------|-----------------------------|
| Zero-point correction=                       | 0.110269 (Hartree/Particle) |
| Thermal correction to Energy=                | 0.121226                    |
| Thermal correction to Enthalpy=              | 0.122171                    |
| Thermal correction to Gibbs Free Energy=     | 0.072413                    |
| Sum of electronic and zero-point Energies=   | -829.135496                 |
| Sum of electronic and thermal Energies=      | -829.124539                 |
| Sum of electronic and thermal Enthalpies=    | -829.123595                 |
| Sum of electronic and thermal Free Energies= | -829.173353                 |

**Frequency: Infrared:**

-190.11 201.3241

**Cartesian coordinates:**

```

0 1
I      0.72482400 -0.05714800  0.01895400
O      0.61467600 -0.81824900  1.60763400
O      1.37419000  1.61494500  0.69654300
O     -2.80624200 -0.70933400  0.88217400
O     -0.71984900  1.01098500 -0.55685300
C     -2.01702100  0.55963300 -1.05885300
C     -3.01663800  0.42624000  0.05455100
H     -1.90494200 -0.35386900 -1.63101800
H     -2.30915200  1.37212400 -1.72426800
H     -3.03456300  1.34065000  0.65258100
H     -3.99766700  0.30088500 -0.40632100
H     -2.02702800 -0.55820100  1.43161500
H      0.74759700  1.98332800  1.34208900
O      2.17042900 -0.16398100 -0.98437100
O     -0.13922900 -1.51482800 -0.88829700
H      0.36022000 -2.32761800 -0.69805400

```

**TS2\_C**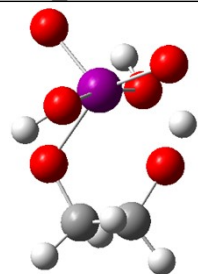**Thermochemistry:**

|                                              |                             |             |             |
|----------------------------------------------|-----------------------------|-------------|-------------|
| Zero-point correction=                       | 0.107188 (Hartree/Particle) |             |             |
| Thermal correction to Energy=                | 0.117104                    |             |             |
| Thermal correction to Enthalpy=              | 0.118048                    |             |             |
| Thermal correction to Gibbs Free Energy=     | 0.072425                    |             |             |
| Sum of electronic and zero-point Energies=   | -829.111349                 |             |             |
| Sum of electronic and thermal Energies=      | -829.101434                 |             |             |
| Sum of electronic and thermal Enthalpies=    | -829.100490                 |             |             |
| Sum of electronic and thermal Free Energies= | -829.146113                 |             |             |
| <b>Frequency: Infrared:</b>                  |                             |             |             |
| -1652.38                                     | 2710.7072                   |             |             |
| <b>Cartesian coordinates:</b>                |                             |             |             |
| 0 1                                          |                             |             |             |
| I                                            | -0.49124900                 | -0.01724100 | 0.03497600  |
| O                                            | -0.94448200                 | 1.62516800  | -0.65582100 |
| O                                            | -0.06891400                 | 0.95032100  | 1.65009400  |
| O                                            | 1.18450800                  | 0.85808700  | -0.88302100 |
| O                                            | 0.88634900                  | -1.25618300 | 0.59920400  |
| C                                            | 2.21958600                  | -0.93873300 | 0.15943900  |
| C                                            | 2.35645100                  | 0.55303800  | -0.12718200 |
| H                                            | 2.42824500                  | -1.51690400 | -0.73940600 |
| H                                            | 2.88802200                  | -1.22908900 | 0.96744200  |
| H                                            | 2.39366800                  | 1.15447500  | 0.77830700  |
| H                                            | 3.23204200                  | 0.73124500  | -0.74658900 |
| H                                            | 0.36607400                  | 1.71076800  | -0.85939100 |
| H                                            | 0.33685800                  | 0.33492200  | 2.28408500  |
| O                                            | -1.91072300                 | -0.83194000 | 0.69044000  |
| O                                            | -0.61461100                 | -0.89520000 | -1.66808800 |
| H                                            | -1.32197200                 | -1.55950800 | -1.59415800 |

|                                                                                     |                             |  |  |
|-------------------------------------------------------------------------------------|-----------------------------|--|--|
| <b>IC2_C</b>                                                                        |                             |  |  |
| 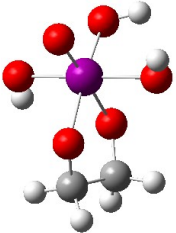 |                             |  |  |
| <b>Thermochemistry:</b>                                                             |                             |  |  |
| Zero-point correction=                                                              | 0.110639 (Hartree/Particle) |  |  |
| Thermal correction to Energy=                                                       | 0.121389                    |  |  |
| Thermal correction to Enthalpy=                                                     | 0.122333                    |  |  |
| Thermal correction to Gibbs Free Energy=                                            | 0.075041                    |  |  |
| Sum of electronic and zero-point Energies=                                          | -829.160297                 |  |  |
| Sum of electronic and thermal Energies=                                             | -829.149547                 |  |  |
| Sum of electronic and thermal Enthalpies=                                           | -829.148603                 |  |  |
| Sum of electronic and thermal Free Energies=                                        | -829.195895                 |  |  |
| <b>Cartesian coordinates:</b>                                                       |                             |  |  |
| 0 1                                                                                 |                             |  |  |

|   |             |             |             |
|---|-------------|-------------|-------------|
| I | 0.40110000  | -0.05403300 | -0.05416200 |
| O | 1.55888800  | -0.83223900 | -1.13989000 |
| O | -1.11411900 | -0.72845500 | -1.05476700 |
| O | -0.96757300 | 0.76148800  | 1.05917600  |
| C | -2.25810000 | 0.72737600  | 0.44268100  |
| C | -2.35489000 | -0.55389800 | -0.36415400 |
| H | -2.37769100 | 1.60728900  | -0.18915200 |
| H | -2.99252200 | 0.73152100  | 1.24547800  |
| H | -2.53062800 | -1.41649200 | 0.27941700  |
| H | -3.13632700 | -0.47647900 | -1.11688600 |
| O | 0.38079300  | -1.56691300 | 1.11650900  |
| H | -0.24516100 | -1.39966800 | 1.84161500  |
| O | 0.36837500  | 1.61959600  | -0.99958100 |
| H | 0.89579600  | 1.52244200  | -1.81047000 |
| O | 1.64670700  | 0.70079200  | 1.17366300  |
| H | 1.82160500  | 1.62009200  | 0.90853200  |

| TS3_D                                                                              |                             |             |             |
|------------------------------------------------------------------------------------|-----------------------------|-------------|-------------|
| 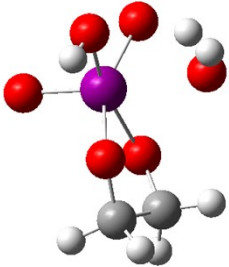 |                             |             |             |
| <b>Thermochemistry:</b>                                                            |                             |             |             |
| Zero-point correction=                                                             | 0.107051 (Hartree/Particle) |             |             |
| Thermal correction to Energy=                                                      | 0.117163                    |             |             |
| Thermal correction to Enthalpy=                                                    | 0.118107                    |             |             |
| Thermal correction to Gibbs Free Energy=                                           | 0.071730                    |             |             |
| Sum of electronic and zero-point Energies=                                         | -829.122032                 |             |             |
| Sum of electronic and thermal Energies=                                            | -829.111920                 |             |             |
| Sum of electronic and thermal Enthalpies=                                          | -829.110976                 |             |             |
| Sum of electronic and thermal Free Energies=                                       | -829.157353                 |             |             |
| <b>Frequency: Infrared:</b>                                                        |                             |             |             |
| -1616.11                                                                           | 2436.7242                   |             |             |
| <b>Cartesian coordinates:</b>                                                      |                             |             |             |
| 0 1                                                                                |                             |             |             |
| I                                                                                  | -0.37030800                 | -0.12916400 | -0.13323200 |
| O                                                                                  | -0.51786600                 | -1.48299700 | -1.25402700 |
| O                                                                                  | -1.59602600                 | -0.74927100 | 1.18666900  |
| O                                                                                  | -0.37742800                 | 1.69754000  | 1.02066700  |
| O                                                                                  | 1.00929900                  | -0.78917700 | 1.05133500  |
| O                                                                                  | 1.09150100                  | 0.75898800  | -1.03630000 |
| C                                                                                  | 2.30656900                  | 0.70388700  | -0.28429200 |
| C                                                                                  | 2.31834300                  | -0.59726000 | 0.49837700  |
| H                                                                                  | 2.35713500                  | 1.56910100  | 0.37593400  |

|   |             |             |             |
|---|-------------|-------------|-------------|
| H | 3.12543000  | 0.71978800  | -1.00038200 |
| H | 2.56387500  | -1.44605800 | -0.13880900 |
| H | 3.00698000  | -0.53249100 | 1.33782400  |
| H | -1.15370900 | -1.39411100 | 1.76659100  |
| H | -0.77042400 | 1.55346600  | 1.89629000  |
| O | -1.61109600 | 1.05905200  | -0.79518400 |
| H | -1.23952500 | 1.78315400  | 0.15405600  |

| <b>TS3_C</b>                                                                      |                             |             |             |
|-----------------------------------------------------------------------------------|-----------------------------|-------------|-------------|
| 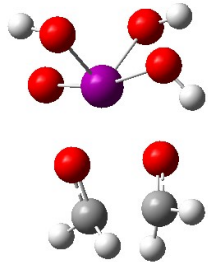 |                             |             |             |
| <b>Thermochemistry:</b>                                                           |                             |             |             |
| Zero-point correction=                                                            | 0.105549 (Hartree/Particle) |             |             |
| Thermal correction to Energy=                                                     | 0.117325                    |             |             |
| Thermal correction to Enthalpy=                                                   | 0.118269                    |             |             |
| Thermal correction to Gibbs Free Energy=                                          | 0.068327                    |             |             |
| Sum of electronic and zero-point Energies=                                        | -829.115392                 |             |             |
| Sum of electronic and thermal Energies=                                           | -829.103616                 |             |             |
| Sum of electronic and thermal Enthalpies=                                         | -829.102672                 |             |             |
| Sum of electronic and thermal Free Energies=                                      | -829.152614                 |             |             |
| <b>Frequency: Infrared:</b>                                                       |                             |             |             |
| -744.52                                                                           | 2044.5382                   |             |             |
| <b>Cartesian coordinates:</b>                                                     |                             |             |             |
| 0 1                                                                               |                             |             |             |
| I                                                                                 | -0.42100300                 | -0.03050200 | -0.08859100 |
| O                                                                                 | -0.68664100                 | -0.64457200 | -1.75454900 |
| O                                                                                 | -1.63585900                 | -1.28289900 | 0.66541000  |
| O                                                                                 | -0.55037100                 | 0.63593900  | 1.83494800  |
| O                                                                                 | 1.27384100                  | -1.35598300 | 0.44426800  |
| O                                                                                 | 1.29252500                  | 1.34181000  | -0.46751100 |
| C                                                                                 | 2.46085100                  | 0.93553400  | -0.09172500 |
| C                                                                                 | 2.45283500                  | -0.96339400 | 0.08732900  |
| H                                                                                 | 2.77230100                  | 1.22251200  | 0.91244700  |
| H                                                                                 | 3.21961900                  | 0.89625900  | -0.87303100 |
| H                                                                                 | 2.77721000                  | -1.25031500 | -0.91248300 |
| H                                                                                 | 3.19808100                  | -0.93532800 | 0.88170200  |
| H                                                                                 | -1.97190100                 | -1.81873000 | -0.07532800 |
| H                                                                                 | 0.24841500                  | 1.15886700  | 2.00464500  |
| O                                                                                 | -1.64965600                 | 1.38456000  | -0.42524200 |
| H                                                                                 | -1.76336200                 | 1.87966700  | 0.40516100  |

**IC2\_B**

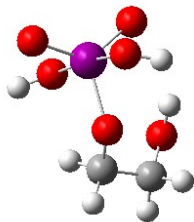
**Thermochemistry:**

|                                              |                             |
|----------------------------------------------|-----------------------------|
| Zero-point correction=                       | 0.110915 (Hartree/Particle) |
| Thermal correction to Energy=                | 0.122232                    |
| Thermal correction to Enthalpy=              | 0.123176                    |
| Thermal correction to Gibbs Free Energy=     | 0.073078                    |
| Sum of electronic and zero-point Energies=   | -829.137091                 |
| Sum of electronic and thermal Energies=      | -829.125774                 |
| Sum of electronic and thermal Enthalpies=    | -829.124830                 |
| Sum of electronic and thermal Free Energies= | -829.174929                 |

**Cartesian coordinates:**

```

0 1
I      0.72996200 -0.04920200  0.04275500
O      0.56524000 -0.27793600  1.78417700
O      1.36284300  1.75170800  0.21719200
O     -2.83373100 -0.35236300  1.04959600
O     -0.72992300  0.79236900 -0.81405600
C     -1.99195400  0.16295100 -1.18573500
C     -3.03484300  0.40827200 -0.13337500
H     -1.84741000 -0.89476600 -1.38148200
H     -2.26144400  0.66914700 -2.11255000
H     -3.08771300  1.47511000  0.09840800
H     -3.99672500  0.10063300 -0.54584500
H     -2.05063700 -0.01925100  1.50557700
H      0.78522100  2.23485200  0.83289100
O      2.14059500 -0.41111400 -0.95219000
O     -0.03340400 -1.78882100 -0.23589100
H      0.15855300 -2.09608400 -1.13897100
  
```

**TS3\_B**
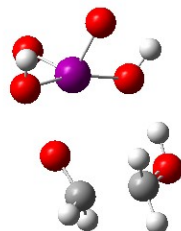
**Thermochemistry:**

|                                            |                             |
|--------------------------------------------|-----------------------------|
| Zero-point correction=                     | 0.105025 (Hartree/Particle) |
| Thermal correction to Energy=              | 0.116815                    |
| Thermal correction to Enthalpy=            | 0.117759                    |
| Thermal correction to Gibbs Free Energy=   | 0.067176                    |
| Sum of electronic and zero-point Energies= | -829.094440                 |

|                                              |                                     |
|----------------------------------------------|-------------------------------------|
| Sum of electronic and thermal Energies=      | -829.082650                         |
| Sum of electronic and thermal Enthalpies=    | -829.081706                         |
| Sum of electronic and thermal Free Energies= | -829.132289                         |
| <b>Frequency: Infrared:</b>                  |                                     |
| -898.12                                      | 11585.9187                          |
| <b>Cartesian coordinates:</b>                |                                     |
| 0 1                                          |                                     |
| I                                            | -0.70589100 -0.05334300 -0.01718400 |
| O                                            | 0.36699700 -1.70559800 0.54812500   |
| O                                            | -1.70233600 -0.99256100 -1.15604900 |
| O                                            | 1.02612500 1.17358100 0.80551400    |
| O                                            | 2.84116300 -1.11148900 -0.11003600  |
| C                                            | 2.72907900 0.05284600 -0.74310000   |
| C                                            | 2.19915100 1.35365400 0.26741800    |
| H                                            | 1.88909500 0.11966500 -1.45422700   |
| H                                            | 3.68112100 0.41531900 -1.11760800   |
| H                                            | 3.00326000 1.18427300 0.99697500    |
| H                                            | 2.29368700 2.21956600 -0.39089700   |
| H                                            | -0.05152000 -2.49595300 0.16802500  |
| H                                            | 1.93606400 -1.47741900 0.10798300   |
| O                                            | -1.60268200 0.06043900 1.50279300   |
| O                                            | -1.28762800 1.68817600 -0.74209400  |
| H                                            | -2.04198600 1.52233200 -1.33143200  |

#### 4. Topological analysis based on QTAIM.

**Table S28.** Calculated bond distances (d, Å), electronic charge densities at BCP ( $\rho$ , a.u.) for IC2\_C and TS3\_C structures.

| Calculated at the B3PW91/6-311+G(2d,p) with 6-311+G(2d,p) basis set for C, O, H atoms and both: the full basis set (DGDZVP) for Iodine atom, the $q$ -BCP computed based on derived wave function. |           |                                       |                                       |                                                    |                                        |                                        |                                                     |
|----------------------------------------------------------------------------------------------------------------------------------------------------------------------------------------------------|-----------|---------------------------------------|---------------------------------------|----------------------------------------------------|----------------------------------------|----------------------------------------|-----------------------------------------------------|
| No.                                                                                                                                                                                                | Bonds     | $q$ -BCP <sub>(IC2_C)</sub><br>[a.u.] | $q$ -BCP <sub>(TS3_C)</sub><br>[a.u.] | $\Delta q$ -BCP <sub>(TS3_C-IC2_C)</sub><br>[a.u.] | d-Bond<br>Dist. <sub>(IC2_C)</sub> [Å] | d-Bond<br>Dist. <sub>(TS3_C)</sub> [Å] | $\Delta d$ -Bond Dist. <sub>(TS3_C-IC2_C)</sub> [Å] |
| 1                                                                                                                                                                                                  | I1 - O2   | 0.1800                                | 0.1714                                | -0.0086                                            | 1.8265                                 | 1.8447                                 | 0.0183                                              |
| 2                                                                                                                                                                                                  | I1 - O3   | 0.1403                                | 0.1370                                | -0.0033                                            | 1.9550                                 | 1.9619                                 | 0.0069                                              |
| 3                                                                                                                                                                                                  | I1 - O4   | 0.1328                                | 0.1094                                | -0.0234                                            | 1.9877                                 | 2.0890                                 | 0.1013                                              |
| 4                                                                                                                                                                                                  | I1 - O5   | 0.1309                                | 0.0773                                | -0.0536                                            | 2.0009                                 | 2.2777                                 | 0.2768                                              |
| 5                                                                                                                                                                                                  | I1 - O6   | 0.1302                                | 0.0747                                | -0.0555                                            | 2.0020                                 | 2.2977                                 | 0.2957                                              |
| 6                                                                                                                                                                                                  | C7 - C8   | 0.2520                                | 0.0944                                | -0.1575                                            | 1.5185                                 | 1.9130                                 | 0.3945                                              |
| 7                                                                                                                                                                                                  | O6 - C7   | 0.2435                                | 0.3407                                | 0.0972                                             | 1.4330                                 | 1.2904                                 | -0.1426                                             |
| 8                                                                                                                                                                                                  | O5 - C8   | 0.2449                                | 0.3399                                | 0.0950                                             | 1.4315                                 | 1.2913                                 | -0.1403                                             |
| 9                                                                                                                                                                                                  | C7 - H9   | 0.2856                                | 0.2868                                | 0.0012                                             | 1.0928                                 | 1.0929                                 | 0.0002                                              |
| 10                                                                                                                                                                                                 | C7 - H10  | 0.2843                                | 0.2827                                | -0.0015                                            | 1.0910                                 | 1.0938                                 | 0.0028                                              |
| 11                                                                                                                                                                                                 | C8 - H11  | 0.2855                                | 0.2872                                | 0.0017                                             | 1.0930                                 | 1.0926                                 | -0.0004                                             |
| 12                                                                                                                                                                                                 | C8 - H12  | 0.2844                                | 0.2832                                | -0.0012                                            | 1.0906                                 | 1.0932                                 | 0.0026                                              |
| 13                                                                                                                                                                                                 | O3 - H13  | 0.3463                                | 0.3458                                | -0.0004                                            | 0.9731                                 | 0.9742                                 | 0.0011                                              |
| 14                                                                                                                                                                                                 | O4 - H14  | 0.3469                                | 0.3507                                | 0.0039                                             | 0.9723                                 | 0.9702                                 | -0.0021                                             |
| 15                                                                                                                                                                                                 | I1 - O15  | 0.1379                                | 0.1354                                | -0.0025                                            | 1.9616                                 | 1.9668                                 | 0.0052                                              |
| 16                                                                                                                                                                                                 | O15 - H16 | 0.3468                                | 0.3457                                | -0.0012                                            | 0.9726                                 | 0.9742                                 | 0.0017                                              |



No.-sequence number; **q-BCP** – electron density at Bond Critical Point;  **$\Delta q$ -BCP**<sub>(TS3\_C-IC2\_C)</sub> – electron density difference between corresponding two Bond Critical Points of the transition state structure TS3\_C and intermediate structure IC2\_C, **d-Bond Dist.** - Bond Distance between the atoms in Å;  **$\Delta d$ -Bond Dist.**<sub>(TS3\_C-IC2\_C)</sub> - difference between two corresponding bond distances of the transition state structure TS3\_C and intermediate structure IC2\_C.

**Table S29.** Calculated bond angles ( $\angle$ , °), in IC2\_C and TS3\_C structures .

| Calculated at the B3PW91/6-311+G(2d,p) with 6-311+G(2d,p) basis set for C, O, H atoms and both: the full basis set (DGDZVP) for Iodine atom. |               |                             |                             |                                             |
|----------------------------------------------------------------------------------------------------------------------------------------------|---------------|-----------------------------|-----------------------------|---------------------------------------------|
| No.                                                                                                                                          | Bond angles   | $\angle$ <sub>(IC2_C)</sub> | $\angle$ <sub>(TS3_C)</sub> | $\Delta\angle$ <sub>(TS3_C-IC2_C)</sub> [°] |
| 1                                                                                                                                            | O2 - I1 - O3  | 94.73130                    | 92.85459                    | -1.87671                                    |
| 2                                                                                                                                            | O2 - I1 - O4  | 171.96741                   | 166.69954                   | -5.26787                                    |
| 3                                                                                                                                            | O2 - I1 - O5  | 95.97872                    | 98.20327                    | 2.22455                                     |
| 4                                                                                                                                            | O2 - I1 - O6  | 96.22805                    | 98.77491                    | 2.54686                                     |
| 5                                                                                                                                            | O2 - I1 - O15 | 89.45495                    | 89.20521                    | -0.24974                                    |
| 6                                                                                                                                            | O3 - I1 - O4  | 78.66853                    | 77.96563                    | -0.70290                                    |
| 7                                                                                                                                            | O3 - I1 - O5  | 89.50017                    | 90.45620                    | 0.95603                                     |
| 8                                                                                                                                            | O3 - I1 - O6  | 167.82450                   | 164.73701                   | -3.08749                                    |
| 9                                                                                                                                            | O3 - I1 - O15 | 96.50361                    | 98.23218                    | 1.72857                                     |
| 10                                                                                                                                           | O4 - I1 - O5  | 88.59623                    | 91.54337                    | 2.94714                                     |
| 11                                                                                                                                           | O4 - I1 - O6  | 90.79583                    | 92.04150                    | 1.24567                                     |
| 12                                                                                                                                           | O4 - I1 - O15 | 86.78094                    | 82.70268                    | -4.07826                                    |
| 13                                                                                                                                           | O5 - I1 - O6  | 84.10446                    | 78.17794                    | -5.92652                                    |
| 14                                                                                                                                           | O5 - I1 - O15 | 171.55847                   | 168.31043                   | -3.24804                                    |
| 15                                                                                                                                           | O6 - I1 - O15 | 88.89810                    | 91.81331                    | 2.91521                                     |
| 16                                                                                                                                           | I1 - O2 - O3  | 44.42689                    | 45.25003                    | 0.82314                                     |
| 17                                                                                                                                           | I1 - O2 - O4  | 4.18635                     | 7.06498                     | 2.87863                                     |
| 18                                                                                                                                           | I1 - O2 - O5  | 44.36123                    | 46.09646                    | 1.73523                                     |
| 19                                                                                                                                           | I1 - O2 - O6  | 44.24063                    | 45.96918                    | 1.72855                                     |
| 20                                                                                                                                           | I1 - O2 - O15 | 47.33500                    | 47.25772                    | -0.07728                                    |
| 21                                                                                                                                           | I1 - O3 - O2  | 40.84180                    | 41.89538                    | 1.05358                                     |
| 22                                                                                                                                           | I1 - O3 - O4  | 51.24538                    | 53.23682                    | 1.99144                                     |
| 23                                                                                                                                           | I1 - O3 - O5  | 45.92015                    | 48.99833                    | 3.07818                                     |
| 24                                                                                                                                           | I1 - O3 - O6  | 6.16033                     | 8.23667                     | 2.07634                                     |

|    |                |           |           |          |
|----|----------------|-----------|-----------|----------|
| 25 | I1 - O3 - O15  | 41.83412  | 40.94613  | -0.88799 |
| 26 | I1 - O4 - O2   | 3.84624   | 6.23548   | 2.38924  |
| 27 | I1 - O4 - O3   | 50.08609  | 48.79755  | -1.28854 |
| 28 | I1 - O4 - O5   | 45.89602  | 46.63759  | 0.74157  |
| 29 | I1 - O4 - O6   | 44.80471  | 46.60832  | 1.80361  |
| 30 | I1 - O4 - O15  | 46.20888  | 46.68896  | 0.48008  |
| 31 | I1 - O5 - O2   | 39.66005  | 35.70027  | -3.95978 |
| 32 | I1 - O5 - O3   | 44.57968  | 40.54547  | -4.03421 |
| 33 | I1 - O5 - O4   | 45.50776  | 41.81904  | -3.68872 |
| 34 | I1 - O5 - O6   | 47.96554  | 51.21921  | 3.25367  |
| 35 | I1 - O5 - O15  | 4.17884   | 5.41521   | 1.23637  |
| 36 | I1 - O6 - O2   | 39.53132  | 35.25591  | -4.27541 |
| 37 | I1 - O6 - O3   | 6.01518   | 7.02631   | 1.01113  |
| 38 | I1 - O6 - O4   | 44.39946  | 41.35019  | -3.04927 |
| 39 | I1 - O6 - O5   | 47.93000  | 50.60285  | 2.67285  |
| 40 | I1 - O6 - O15  | 44.95542  | 39.79452  | -5.16090 |
| 41 | I1 - O15 - O2  | 43.21005  | 43.53707  | 0.32702  |
| 42 | I1 - O15 - O3  | 41.66227  | 40.82170  | -0.84057 |
| 43 | I1 - O15 - O4  | 47.01018  | 50.60836  | 3.59818  |
| 44 | I1 - O15 - O5  | 4.26270   | 6.27435   | 2.01165  |
| 45 | I1 - O15 - O6  | 46.14648  | 48.39217  | 2.24569  |
| 46 | C7 - O6 - O5   | 66.12253  | 62.98997  | -3.13256 |
| 47 | C8 - O5 - O3   | 155.97756 | 152.21622 | -3.76135 |
| 48 | H9 - C7 - O6   | 116.98791 | 109.35147 | -7.63644 |
| 49 | H10 - C7 - O6  | 115.67908 | 106.56712 | -9.11196 |
| 50 | H11 - C8 - O5  | 117.03873 | 109.83144 | -7.20729 |
| 51 | H12 - C8 - O5  | 115.47222 | 106.57544 | -8.89677 |
| 52 | H13 - O3 - I1  | 104.55563 | 105.01691 | 0.46128  |
| 53 | H14 - O4 - O3  | 146.60387 | 157.11699 | 10.51313 |
| 54 | H16 - O15 - O2 | 148.76456 | 150.31855 | 1.55398  |

|    |          |           |           |          |
|----|----------|-----------|-----------|----------|
| 55 | I1-O5-C8 | 108.64835 | 115.83204 | 7.18369  |
| 56 | O5-C8-C7 | 108.75013 | 109.48057 | 0.73044  |
| 57 | C8-C7-O6 | 109.10543 | 109.78573 | 0.68030  |
| 58 | C7-O6-I1 | 110.57135 | 116.12607 | 5.55472  |
| 59 | O5-I1-O6 | 84.10446  | 78.17794  | -5.92652 |

**Table S30.** Calculated electron density derivatives for TS3\_C structure.

| Calculated at the B3PW91/6-311+G(2d,p) with 6-311+G(2d,p) basis set for C, O, H atoms and both: the full basis set (DGDZVP) for Iodine atom, the $\rho$ -BCP computed based on derived wave function. |           |                |             |          |             |           |
|-------------------------------------------------------------------------------------------------------------------------------------------------------------------------------------------------------|-----------|----------------|-------------|----------|-------------|-----------|
| No.                                                                                                                                                                                                   | Bonds     | DelSqRho [Rho] | Ellipticity | K        | BPL - GBL_I | L         |
| 1                                                                                                                                                                                                     | I1 - O2   | 0.416944       | 0.011607    | 0.105122 | 0.000059    | -0.104236 |
| 2                                                                                                                                                                                                     | I1 - O3   | 0.259293       | 0.097343    | 0.070032 | 0.000685    | -0.064823 |
| 3                                                                                                                                                                                                     | I1 - O4   | 0.190308       | 0.084258    | 0.043532 | 0.002605    | -0.047577 |
| 4                                                                                                                                                                                                     | I1 - O5   | 0.140193       | 0.075646    | 0.016972 | 0.010594    | -0.035048 |
| 5                                                                                                                                                                                                     | I1 - O6   | 0.137329       | 0.066936    | 0.015291 | 0.009453    | -0.034332 |
| 6                                                                                                                                                                                                     | C7 - C8   | 0.004129       | 0.020815    | 0.033859 | 0.00351     | -0.001032 |
| 7                                                                                                                                                                                                     | O6 - C7   | -0.447502      | 0.030053    | 0.564012 | 0.000208    | 0.111876  |
| 8                                                                                                                                                                                                     | O5 - C8   | -0.44523       | 0.027214    | 0.56214  | 0.000237    | 0.111308  |
| 9                                                                                                                                                                                                     | C7 - H9   | -1.013866      | 0.024882    | 0.283433 | 0.00041     | 0.253467  |
| 10                                                                                                                                                                                                    | C7 - H10  | -0.991826      | 0.033153    | 0.278643 | 0.00042     | 0.247957  |
| 11                                                                                                                                                                                                    | C8 - H11  | -1.016989      | 0.024382    | 0.28406  | 0.000427    | 0.254247  |
| 12                                                                                                                                                                                                    | C8 - H12  | -0.996039      | 0.031915    | 0.279484 | 0.00041     | 0.24901   |
| 13                                                                                                                                                                                                    | O3 - H13  | -2.398265      | 0.017454    | 0.663558 | 0.000472    | 0.599566  |
| 14                                                                                                                                                                                                    | O4 - H14  | -2.356663      | 0.015581    | 0.660279 | 0.000229    | 0.589166  |
| 15                                                                                                                                                                                                    | I1 - O15  | 0.258137       | 0.096211    | 0.068292 | 0.000884    | -0.064534 |
| 16                                                                                                                                                                                                    | O15 - H16 | -2.401528      | 0.017175    | 0.664561 | 0.000391    | 0.600382  |

No.-sequence number; **DelSqRho [Rho]** - Laplacian of the electron density (DelSqRho) [Rho]; **Ellipticity** - Ellipticity of the electron density at BCPs; **K** - Hamiltonian form of the electronic kinetic energy density at BCPs (K); **BPL - GBL\_I** - Bond Path Length (BPL) with a corresponding Geometric Bond Length (GBL\_I, the Euclidean distance between nuclear attractors connected by a Bond Path) (BPL - GBL\_I); **L** - Electronic Lagrangian density at BCPs.

**Table S31.** Calculated electron density derivatives for IC2\_C structure.

| Calculated at the B3PW91/6-311+G(2d,p) with 6-311+G(2d,p) basis set for C, O, H atoms and both: the full basis set (DGDZVP) for Iodine atom, the $\rho$ -BCP computed based on derived wave function. |  |  |  |  |  |  |
|-------------------------------------------------------------------------------------------------------------------------------------------------------------------------------------------------------|--|--|--|--|--|--|
|-------------------------------------------------------------------------------------------------------------------------------------------------------------------------------------------------------|--|--|--|--|--|--|

| No. | Bonds     | DelSqRho [Rho] | Ellipticity | K        | BPL - GBL_I | L         |
|-----|-----------|----------------|-------------|----------|-------------|-----------|
| 1   | I1 - O2   | 0.402356       | 0.009071    | 0.115659 | 0.00003     | -0.100589 |
| 2   | I1 - O3   | 0.257998       | 0.082829    | 0.07378  | 0.000715    | -0.064499 |
| 3   | I1 - O4   | 0.223887       | 0.087497    | 0.06661  | 0.001506    | -0.055972 |
| 4   | I1 - O5   | 0.203807       | 0.079519    | 0.065097 | 0.001547    | -0.050952 |
| 5   | I1 - O6   | 0.206242       | 0.076937    | 0.064232 | 0.00186     | -0.051561 |
| 6   | C7 - C8   | -0.48804       | 0.029432    | 0.326286 | 0.001137    | 0.12201   |
| 7   | O6 - C7   | -0.494326      | 0.031066    | 0.32903  | 0.001042    | 0.123581  |
| 8   | O5 - C8   | -0.572613      | 0.034805    | 0.19971  | 0.000521    | 0.143153  |
| 9   | C7 - H9   | -0.995042      | 0.039392    | 0.281685 | 0.000437    | 0.248761  |
| 10  | C7 - H10  | -0.997131      | 0.03404     | 0.281664 | 0.000353    | 0.249283  |
| 11  | C8 - H11  | -0.993329      | 0.039548    | 0.281275 | 0.000447    | 0.248332  |
| 12  | C8 - H12  | -0.998844      | 0.033286    | 0.282053 | 0.000351    | 0.249711  |
| 13  | O3 - H13  | -2.408921      | 0.017507    | 0.666199 | 0.00043     | 0.60223   |
| 14  | O4 - H14  | -2.396828      | 0.017807    | 0.664527 | 0.000407    | 0.599207  |
| 15  | I1 - O15  | 0.255883       | 0.072993    | 0.071172 | 0.001136    | -0.063971 |
| 16  | O15 - H16 | -2.40848       | 0.017186    | 0.666615 | 0.000425    | 0.60212   |

No.-sequence number; **DelSqRho [Rho]** - Laplacian of the electron density (DelSqRho) [Rho]; **Ellipticity** - Ellipticity of the electron density at BCPs; **K** - Hamiltonian form of the electronic kinetic energy density at BCPs (K); **BPL - GBL\_I** - Bond Path Length (BPL) with a corresponding Geometric Bond Length (GBL\_I, the Euclidean distance between nuclear attractors connected by a Bond Path) (BPL - GBL\_I); **L** - Electronic Lagrangian density at BCPs.

## 5. Bibliography

1. Becke, Axel D. "Density-Functional Thermochemistry. Iii. The Role of Exact Exchange." *The Journal of Chemical Physics* 98, no. 7 (1993): 5648-52.
2. Becke, A. D. "Density-Functional Exchange-Energy Approximation with Correct Asymptotic Behavior." *Phys Rev A Gen Phys* 38, no. 6 (1988): 3098-100.
3. Yanai, Takeshi, David P. Tew, and Nicholas C. Handy. "A New Hybrid Exchange–Correlation Functional Using the Coulomb-Attenuating Method (Cam-B3lyp)." *Chemical Physics Letters* 393, no. 1 (2004): 51-57.
4. Boese, A. Daniel, and Jan M. L. Martin. "Development of Density Functionals for Thermochemical Kinetics." *The Journal of Chemical Physics* 121, no. 8 (2004): 3405-16.
5. Chai, Jeng-Da, and Martin Head-Gordon. "Long-Range Corrected Hybrid Density Functionals with Damped Atom–Atom Dispersion Corrections." *Physical Chemistry Chemical Physics* 10, no. 44 (2008): 6615-20.
6. Moto Ongagna, Jean, Aymard Didier Tamafo Fouegue, Baruch Ateba Amana, Gaël Mouzong D'ambassa, Joseph Zobo Mfomo, Luc Mbaze Meva'A, and Désiré Bikele Mama. "B3lyp, M06 and B3pw91 Dft Assignment of Nd8 Metal-Bis-(N-Heterocyclic Carbene) Complexes." *Journal of Molecular Modeling* 26, no. 9 (2020): 246.
7. Govindarajan, M., K. Ganasan, S. Periandy, and S. Mohan. "Dft (Lsda, B3lyp and B3pw91) Comparative Vibrational Spectroscopic Analysis of A-Acetonaphthone." *Spectrochimica Acta Part A: Molecular and Biomolecular Spectroscopy* 76, no. 1 (2010): 12-21.
8. Tawada, Yoshihiro, Takao Tsuneda, Susumu Yanagisawa, Takeshi Yanai, and Kimihiko Hirao. "A Long-Range-Corrected Time-Dependent Density Functional Theory." *The Journal of Chemical Physics* 120, no. 18 (2004): 8425-33.
9. Caballero-García, Guillermo, Moisés Romero-Ortega, and Joaquín Barroso-Flores. "Reactivity of Electrophilic Chlorine Atoms Due to  $\Sigma$ -Holes: A Mechanistic Assessment of the Chemical Reduction of a Trichloromethyl Group by Sulfur Nucleophiles." *Physical Chemistry Chemical Physics* 18, no. 39 (2016): 27300-07.
10. El-Gogary, Tarek M., and Ahmed M. El-Nahas. "Origin of Reverse Stability of Diphosphouracil Tautomers Compared to Their Analogue Uracil: Dft and Ab Initio Study." *Journal of Molecular Structure: THEOCHEM* 851, no. 1 (2008): 54-62.
11. Vandeputte, Aäron G., Marie-Françoise Reyniers, and Guy B. Marin. "A Theoretical Study of the Thermodynamics and Kinetics of Small Organosulfur Compounds." *Theoretical Chemistry Accounts* 123, no. 5 (2009): 391-412.
12. Ditchfield, R., W. J. Hehre, and J. A. Pople. "Self-Consistent Molecular-Orbital Methods. Ix. An Extended Gaussian-Type Basis for Molecular-Orbital Studies of Organic Molecules." *The Journal of Chemical Physics* 54, no. 2 (1971): 724-28.
13. Godbout, Nathalie, Dennis R. Salahub, Jan Andzelm, and Erich Wimmer. "Optimization of Gaussian-Type Basis Sets for Local Spin Density Functional Calculations. Part I. Boron through Neon, Optimization Technique and Validation." *Canadian Journal of Chemistry* 70, no. 2 (1992): 560-71.
14. Sosa, Carlos, Jan Andzelm, Brad C. Elkin, Erich Wimmer, Kerwin D. Dobbs, and David A. Dixon. "A Local Density Functional Study of the Structure and Vibrational Frequencies of Molecular Transition-Metal Compounds." *The Journal of Physical Chemistry* 96, no. 16 (1992): 6630-36.
15. Weigend, Florian. "Accurate Coulomb-Fitting Basis Sets for H to Rn." *Physical Chemistry Chemical Physics* 8, no. 9 (2006): 1057-65.

16. Weigend, Florian, and Reinhart Ahlrichs. "Balanced Basis Sets of Split Valence, Triple Zeta Valence and Quadruple Zeta Valence Quality for H to Rn: Design and Assessment of Accuracy." *Physical Chemistry Chemical Physics* 7, no. 18 (2005): 3297-305.
17. Duke, Frederick R. "Theory and Kinetics of Specific Oxidation. II. The Periodate-Glycol Reaction." *Journal of the American Chemical Society* 69, no. 12 (1947): 3054-55.
18. Duke, Frederick R., and Vernon C. Bulgrin. "The Kinetics of the Periodate Oxidation of Ethylene Glycol and a Series of Methylated Ethylene Glycols." *Journal of the American Chemical Society* 76, no. 14 (1954): 3803-06.
